# Supplementary material for: A double ouroboros-shaped noncovalent molecular dimer
Source: Royal Society of Chemistry journal article supplement (doi:10.1039/d3ce00264k), 2023-01-01
Supplement: d3ce00264k1.pdf [file d3ce00264k1.pdf]

## A double ouroboros-shaped noncovalent molecular dimer

Moon Kedia, K. R. Soumya, Upasana Phukon, Isha Mishra, Reema L. Borkar, Palanichamy Vengadeshwaran, Mamina Bhol, and Malaichamy Sathiyendiran\*

School of Chemistry, University of Hyderabad, Hyderabad 500 046, India.

### Contents

#### Experimental section.

Synthesis of **TMe**.

Synthesis of **TEt**.

Synthesis of **TXy**.

Synthesis of **TH**.

**Figure S1.** ATR-IR spectrum of **TMe**.

**Figure S2.** ATR-IR spectrum of **TEt**.

**Figure S3.** ATR-IR spectrum of **TXy**.

**Figure S4.** ATR-IR spectrum of **TH**.

**Figure S5.** Experimental ESI mass spectrum of **TMe** in positive ion mode.

**Figure S6.** <sup>1</sup>H NMR spectrum of **TMe** in DMSO-*d*<sub>6</sub>.

**Figure S7.** <sup>13</sup>C NMR spectrum of **TMe** in DMSO-*d*<sub>6</sub>.

**Figure S8.** Partial <sup>1</sup>H-<sup>1</sup>H COSY NMR spectrum of **TMe** in CDCl<sub>3</sub>.

**Figure S9.** Partial <sup>1</sup>H NMR spectra of thbz and **TMe** in DMSO-*d*<sub>6</sub>.

**Figure S10.** <sup>1</sup>H NMR spectrum of **TEt** in DMSO-*d*<sub>6</sub>.

**Figure S11.** <sup>13</sup>C NMR spectrum of **TEt** in DMSO-*d*<sub>6</sub>.

**Figure S12.** Partial <sup>1</sup>H-<sup>1</sup>H COSY NMR spectrum of **TEt** in DMSO-*d*<sub>6</sub>.

**Figure S13.** Partial <sup>1</sup>H NMR spectra of thbz and **TEt** in DMSO-*d*<sub>6</sub>.

**Figure S14.** Experimental ESI mass spectrum of **TEt** in positive ion mode.

**Figure S15.** <sup>1</sup>H NMR spectrum of **TXy** in DMSO-*d*<sub>6</sub>.

**Figure S16.** <sup>13</sup>C NMR spectrum of **TXy** in DMSO-*d*<sub>6</sub>.

**Figure S17.** Partial <sup>1</sup>H-<sup>1</sup>H COSY NMR spectrum of **TXy** in DMSO-*d*<sub>6</sub>.

**Figure S18.** Partial <sup>1</sup>H NMR spectra of thbz and **TXy** in DMSO-*d*<sub>6</sub>.

**Figure S19.** Experimental ESI mass spectrum of **TXy** in positive ion mode.

**Figure S20.** <sup>1</sup>H NMR spectrum of **TH** in DMSO-*d*<sub>6</sub>.

**Figure S21.** <sup>13</sup>C NMR spectrum of **TH** in DMSO-*d*<sub>6</sub>.

**Figure S22.** Partial <sup>1</sup>H-<sup>1</sup>H COSY NMR spectrum of **TH** in DMSO-*d*<sub>6</sub>.

**Figure S23.** Partial  $^1\text{H}$  NMR spectra of thbz and **TH** in  $\text{DMSO-}d_6$ .

**Figure S24.** Experimental ESI mass spectrum of **TH** in positive ion mode.

**Figure S25.**  $^1\text{H}$  DOSY NMR spectrum of **TMe** in  $\text{DMSO-}d_6$ .

**Figure S26.**  $^1\text{H}$  DOSY NMR spectrum of **TEt** in  $\text{DMSO-}d_6$ .

**Figure S27.**  $^1\text{H}$  DOSY NMR spectrum of **TXy** in  $\text{DMSO-}d_6$ .

**Figure S28.**  $^1\text{H}$  DOSY NMR spectrum of **TH** in  $\text{DMSO-}d_6$ .

**Figure S29.**  $^1\text{H}$ -NMR titration at 298 K of **TMe** in  $\text{DMSO-}d_6/\text{D}_2\text{O}$  mixture in the following vol/vol ratio (i) 100:0, (ii) 77:23, (iii) 71:29, (iv) 56:44 and (v) 71:29.

**Figure S30.**  $^1\text{H}$ -NMR spectra of titration of **TMe** +  $\text{CF}_3\text{COOH}$  at 298 K in  $\text{DMSO-}d_6/\text{D}_2\text{O}$  mixture in the following vol/vol ratio (i) 100 : 0 (ii) 98.5 : 1.5, (iii) 97 : 3,(iv) 92.5 : 7.5, (v) 72 : 28, (vi) 87.5 : 12.5 and (vii) 66 : 34.

## Experimental Section

### Materials and Methods

2-(4-Thiazolyl)benzimidazole, 1,3,5-tris(bromomethyl)benzene, 1,3,5-tris(bromomethyl)-2,4,6-triethylbenzene were purchased from Sigma-Aldrich; KOH from Avra and dimethylformamide (DMF) from Finar and used as received. 1,3,5-tris(bromomethyl)-2,4,6-trimethylbenzene and 1,3,5-tri(bromomethyl)-2,4-dimethylbenzene was prepared from previously reported methods.<sup>10</sup> <sup>1</sup>H NMR spectra were recorded on Bruker Avance III 400 and 500 MHz instruments. The mass spectra were obtained on a Bruker maXis mass spectrometer. Single crystal X-ray data of **TMe**, **TEt** and **TXy** were collected on a Rigaku Oxford Diffractometer ( $\lambda(\text{Mo K}\alpha) = 0.71073\text{\AA}$ ). The molecular structures were solved by direct methods using SHELXS-97 (Sheldrick 2008) and refined using the SHELXL-2018/3 program (within the WinGX program package). Non-H atoms were refined anisotropically.<sup>1</sup> The lattice solvent molecules in compound **TEt** could not be modelled and hence their contributions to intensities were excluded using SQUEEZE option in PLATON program.<sup>2</sup> The structure contains solvent accessible voids. A solvent mask was calculated and 119 electrons were found in a volume of 358 V( $\text{\AA}^3$ ) in 1 void per unit cell. This is consistent with the presence of 1[CHCl<sub>3</sub>] per asymmetric unit which accounts for 119 electrons per unit cell. For compound **TEt**, one of the thiazole unit was found to be disordered over two positions. The disordered thiazole unit in **TEt** has been successfully modelled with the help of the instructions found in PART 1 (S1, N9, C28-C30) and PART 2 (S1A, N9A, C28-C30A). After refining as a free variable, the site-of-occupancy is almost 0.43 and 0.57, respectively. The disordered unit was modelled using restraints like SADI and SIMU.

### 1,3,5-Tris(2-(4-thiazolyl)benzimidazol-1-ylmethyl)2,4,6-trimethylbenzene (**TMe**)

A mixture of 2-(4-thiazolyl)benzimidazole (302.66 mg, 1.50 mmol) and KOH (112.51 mg, 2.0 mmol) was stirred in DMF (10 mL) at room temperature for 3 h. 1,3,5-Tri(bromomethyl)2,4,6-trimethylbenzene (200 mg, 0.50 mmol) was added to the reaction mixture and continuously allowed to stir for 72 h. The reaction was quenched by adding ice cold water (200 mL). The powder was collected by filtration. Yellow crystals of **TMe** were obtained from chloroform: acetone at room temperature after few days. Yield: 80% (475 mg, 0.62 mmol). <sup>1</sup>H NMR (500 MHz, DMSO-*d*<sub>6</sub>):  $\delta(\text{ppm})$  9.36 (d, 3H,  $J = 2$  Hz, H<sup>f</sup>), 8.53 (d, 3H,  $J = 2$  Hz, H<sup>e</sup>), 7.62 (d, 3H,  $J = 8.0$  Hz, H<sup>d</sup>), 7.14 (t, 3H,  $J = 7.5$  Hz, H<sup>c</sup>), 6.61 (t, 3H,  $J = 7.5$  Hz, H<sup>b</sup>), 6.34 (d, 3H,  $J = 8.0$  Hz, H<sup>a</sup>), 6.20 (s, 6H,  $-\text{CH}_2-$ ), 2.18 (s, 9H,  $-\text{CH}_3$ ). <sup>13</sup>C NMR (500 MHz,

DMSO-*d*<sub>6</sub>):  $\delta$ (ppm) 162.93, 155.74, 147.43, 142.99, 138.33, 135.40, 132.34, 123.21, 119.61, 111.72, 46.20, 36.29, 31.28, 17.21. HRMS (*m/z*): [**TMe** + H]<sup>+</sup> calc. for C<sub>42</sub>H<sub>34</sub>N<sub>9</sub>S<sub>3</sub>, 760.2099; found: 760.2099. Decomposition temperature: 360 °C.

### **1,3,5-Tris(2-(4-thiazolyl)benzimidazol-1-ylmethyl)2,4,6-triethylbenzene (TEt)**

A mixture of 2-(4-thiazolyl)benzimidazole (136.8 mg, 0.68 mmol) and KOH (50.8 mg, 0.90 mmol) was stirred in DMF (10 mL) at room temperature for 3 h. 1,3,5-Tri(bromomethyl)2,4,6-triethylbenzene (100 mg, 0.22 mmol) was added to the reaction mixture and continuously allowed to stir for 72 h. The reaction was quenched by adding ice cold water (200 mL). The powder was collected by filtration. Colourless crystals of **TEt** were obtained from chloroform: acetone at room temperature after few days. Yield: 93.3% (194.7 mg, 0.24 mmol). <sup>1</sup>H NMR (500 MHz, DMSO-*d*<sub>6</sub>):  $\delta$ (ppm) 9.39 (d, 3H, *J* = 1.5 Hz, H<sup>f</sup>), 8.55 (d, 3H, *J* = 2.0 Hz, H<sup>e</sup>), 7.64 (d, 3H, *J* = 8.0 Hz, H<sup>d</sup>), 7.14-7.10 (m, 3H, H<sup>c</sup>), 6.37 (s, 6H, H<sup>a,b</sup>), 6.16 (s, 6H, -CH<sub>2</sub>-), 2.81 (d, 6H, *J* = 7.0 Hz, -CH<sub>2</sub>(ethyl)), 0.67 (s, 9H, -CH<sub>3</sub>). <sup>13</sup>C NMR (500 MHz, DMSO-*d*<sub>6</sub>):  $\delta$ (ppm) 162.46, 155.44, 147.23, 145.50, 143.02, 135.34, 131.22, 123.61, 122.57, 121.84, 119.43, 112.24, 44.71, 35.93, 30.93, 23.15, 15.02. HRMS (*m/z*): [**TEt** + H]<sup>+</sup> calc. for C<sub>45</sub>H<sub>40</sub>N<sub>9</sub>S<sub>3</sub>, 802.2569; found: 802.2570. Decomposition temperature: 390 °C.

### **1,3,5-Tris(2-(4-thiazolyl)benzimidazol-1-ylmethyl)2,4-dimethylbenzene (TXy)**

A mixture of 2-(4-thiazolyl)benzimidazole (156.84 mg, 0.78 mmol) and KOH (56.11 mg, 1.04 mmol) was stirred in DMF (10 mL) at room temperature for 3 h. 1,3,5-Tri(bromomethyl)-2,4-dimethylbenzene (100 mg, 0.26 mmol) was added to the reaction mixture and continuously allowed to stir for 72 h. The reaction was quenched by adding ice cold water (200 mL). The powder was collected by filtration. Colourless crystals of **TXy** were obtained from chloroform: acetone at room temperature after few days. <sup>1</sup>H NMR (500 MHz, DMSO-*d*<sub>6</sub>): Major isomer:  $\delta$ (ppm) 8.99 (d, 2H, *J* = 2.1 Hz, H<sup>f</sup>), 8.93 (d, 1H, *J* = 2.1 Hz, H<sup>f</sup>), 7.97 (d, 2H, *J* = 2 Hz, H<sup>e</sup>), 7.93 (d, 2H, *J* = 2 Hz, H<sup>e</sup>), 7.62 (t, 3H, *J* = 8.7 Hz, H<sup>d,d'</sup>), 7.19-7.16 (m, 3H, H<sup>c,c'</sup>), 6.99-6.96 (m, 7H, H<sup>a, a',b,b',g</sup>), 5.76-5.75 (s, 6H, -CH<sub>2</sub>-), 2.19 (s, 6H, -CH<sub>3</sub>). <sup>13</sup>C NMR (500 MHz, DMSO-*d*<sub>6</sub>):  $\delta$ (ppm) 146.66, 142.56, 135.41, 133.57, 122.25, 119.33, 110.62, 45.53, 18.22, 14.92. HRMS (*m/z*): [**TXy** + H]<sup>+</sup> calc. for C<sub>45</sub>H<sub>40</sub>N<sub>9</sub>S<sub>3</sub>, 746.1943; found: 746.1947. Decomposition temperature: 370 °C.

### 1,3,5-Tris(2-(4-thiazolyl)benzimidazol-1-ylmethyl)benzene (TH)

A mixture of 2-(4-thiazolyl)benzimidazole (169.17 mg, 0.84 mmol) and KOH (62.88 mg, 1.12 mmol) was stirred in DMF (10 mL) at room temperature for 3 h. 1,3,5-Tri(bromomethyl)benzene (100 mg, 0.28 mmol) was added to the reaction mixture and continuously allowed to stir for 72 h. The reaction was quenched by adding ice cold water (200 mL). The powder was collected by filtration. Yield: 91.4% (220 mg, 0.30 mmol).  $^1\text{H}$  NMR (500 MHz, DMSO- $d_6$ ):  $\delta$ (ppm) 8.88 (d, 3H,  $J = 2$  Hz, H<sup>f</sup>), 8.21 (d, 3H,  $J = 2.5$  Hz, H<sup>e</sup>), 7.65 (d, 3H,  $J = 8.0$  Hz, H<sup>d</sup>), 7.27 (d, 3H,  $J = 8.0$  Hz, H<sup>a</sup>), 7.23 (t, 3H,  $J = 7.5$  Hz, H<sup>c</sup>), 7.13 (t, 3H,  $J = 7.5$  Hz, H<sup>b</sup>), 6.88 (s, 3H, H<sup>g</sup>), 5.77 (s, 6H,  $-\text{CH}_2-$ ). HRMS ( $m/z$ ):  $^{13}\text{C}$  NMR (500 MHz, DMSO- $d_6$ ):  $\delta$ (ppm) 155.38, 147.02, 146.63, 142.96, 138.52, 135.87, 125.69, 122.94, 119.57, 111.29. [**TH** + H]<sup>+</sup> calc. for C<sub>39</sub>H<sub>28</sub>N<sub>9</sub>S<sub>3</sub>, 718.1630; found: 718.1630. Decomposition temperature: 410 °C

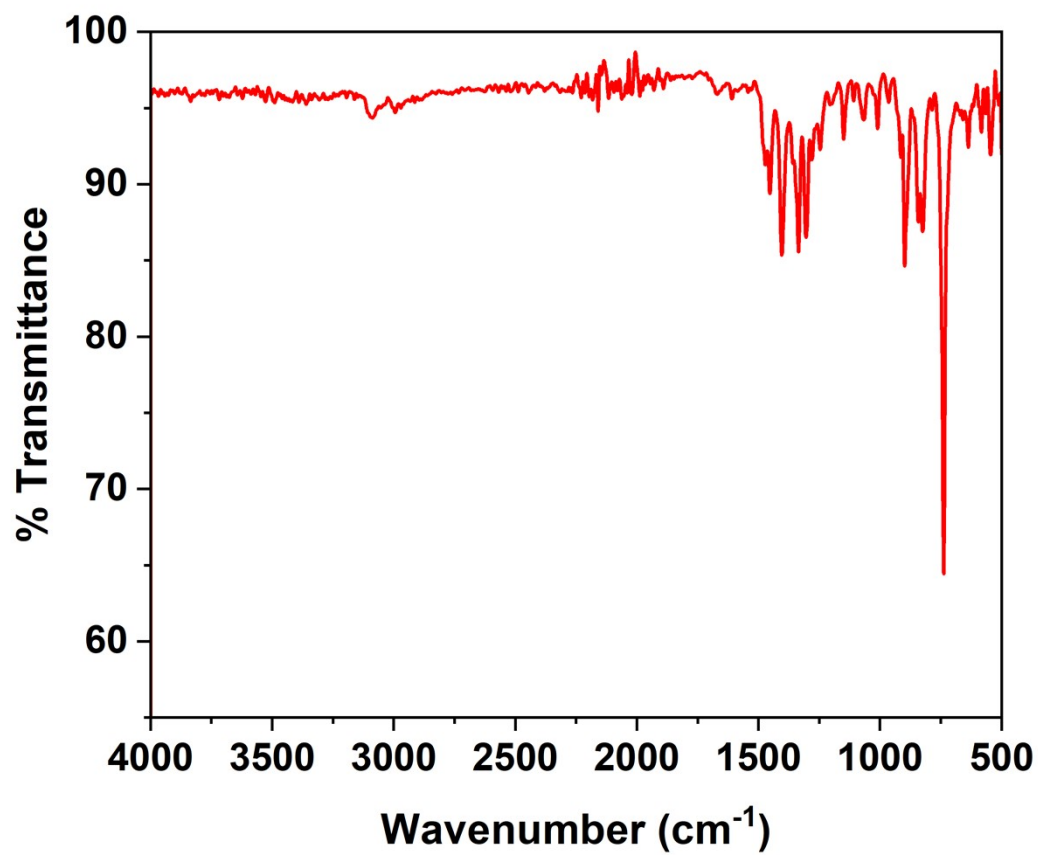

Figure S1. ATR-IR spectrum of TMe.

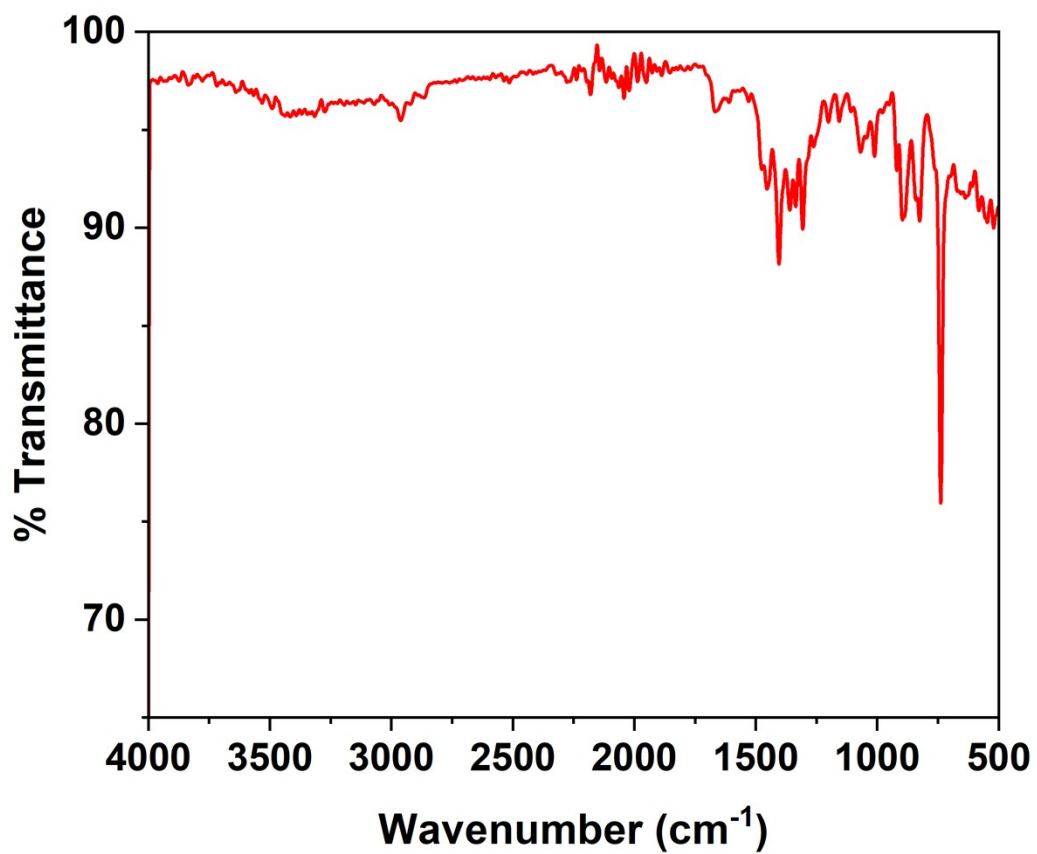

**Figure S2.** ATR-IR spectrum of TEt.

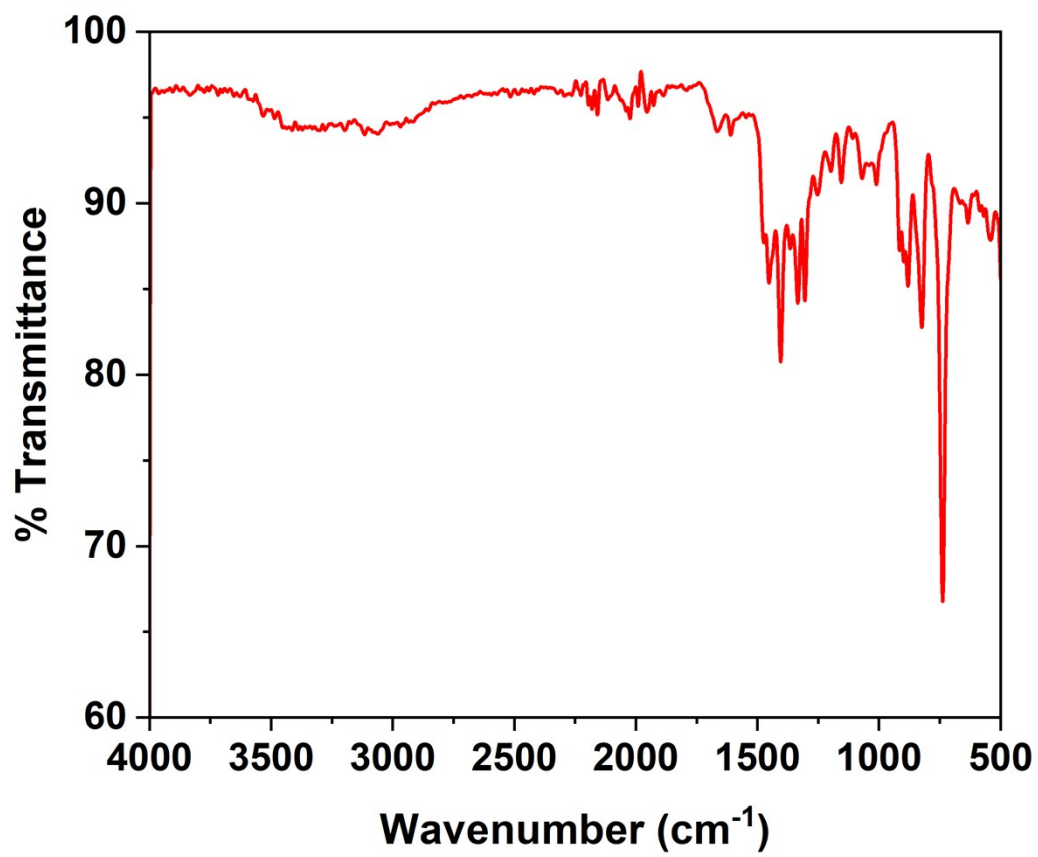

Figure S3. ATR-IR spectrum of TXy.



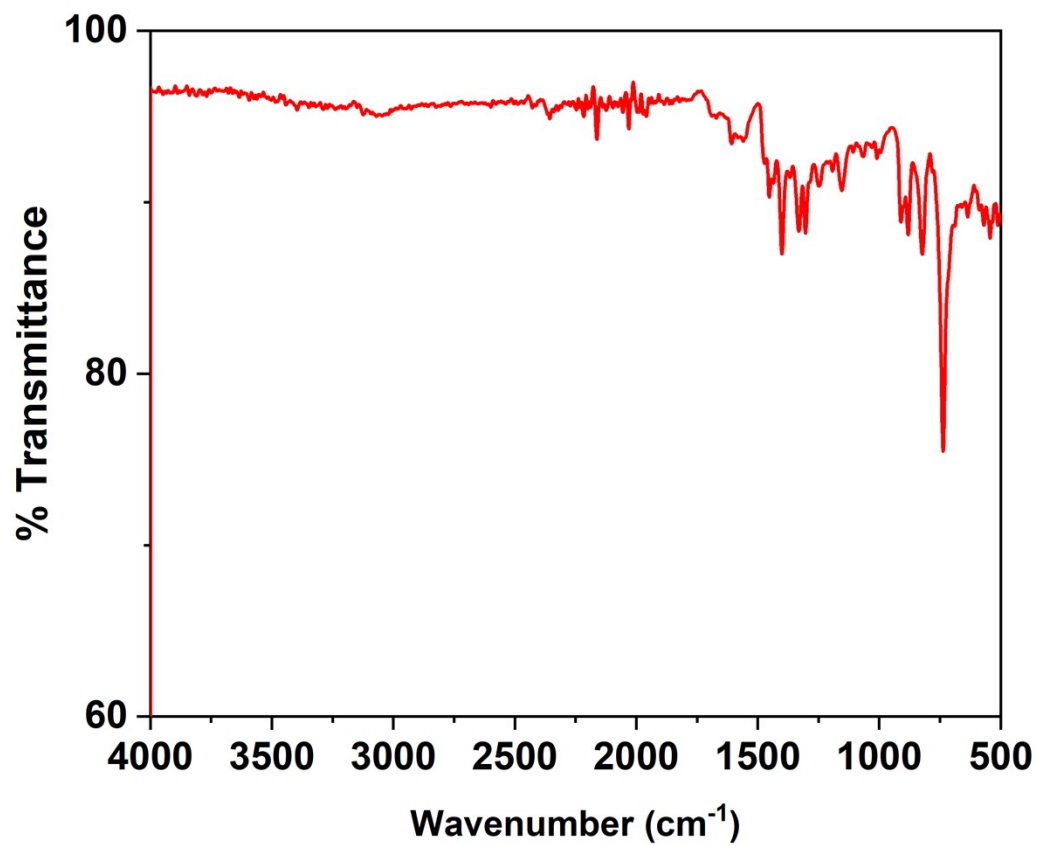

Figure S4. ATR-IR spectrum of TH.

**Acquisition Parameter**

|             |            |                      |          |                  |           |
|-------------|------------|----------------------|----------|------------------|-----------|
| Source Type | ESI        | Ion Polarity         | Positive | Set Nebulizer    | 0.3 Bar   |
| Focus       | Not active | Set Capillary        | 3500 V   | Set Dry Heater   | 180 °C    |
| Scan Begin  | 50 m/z     | Set End Plate Offset | -500 V   | Set Dry Gas      | 4.0 l/min |
| Scan End    | 2000 m/z   | Set Charging Voltage | 0 V      | Set Divert Valve | Waste     |
|             |            | Set Corona           | 0 nA     | Set APCI Heater  | 0 °C      |

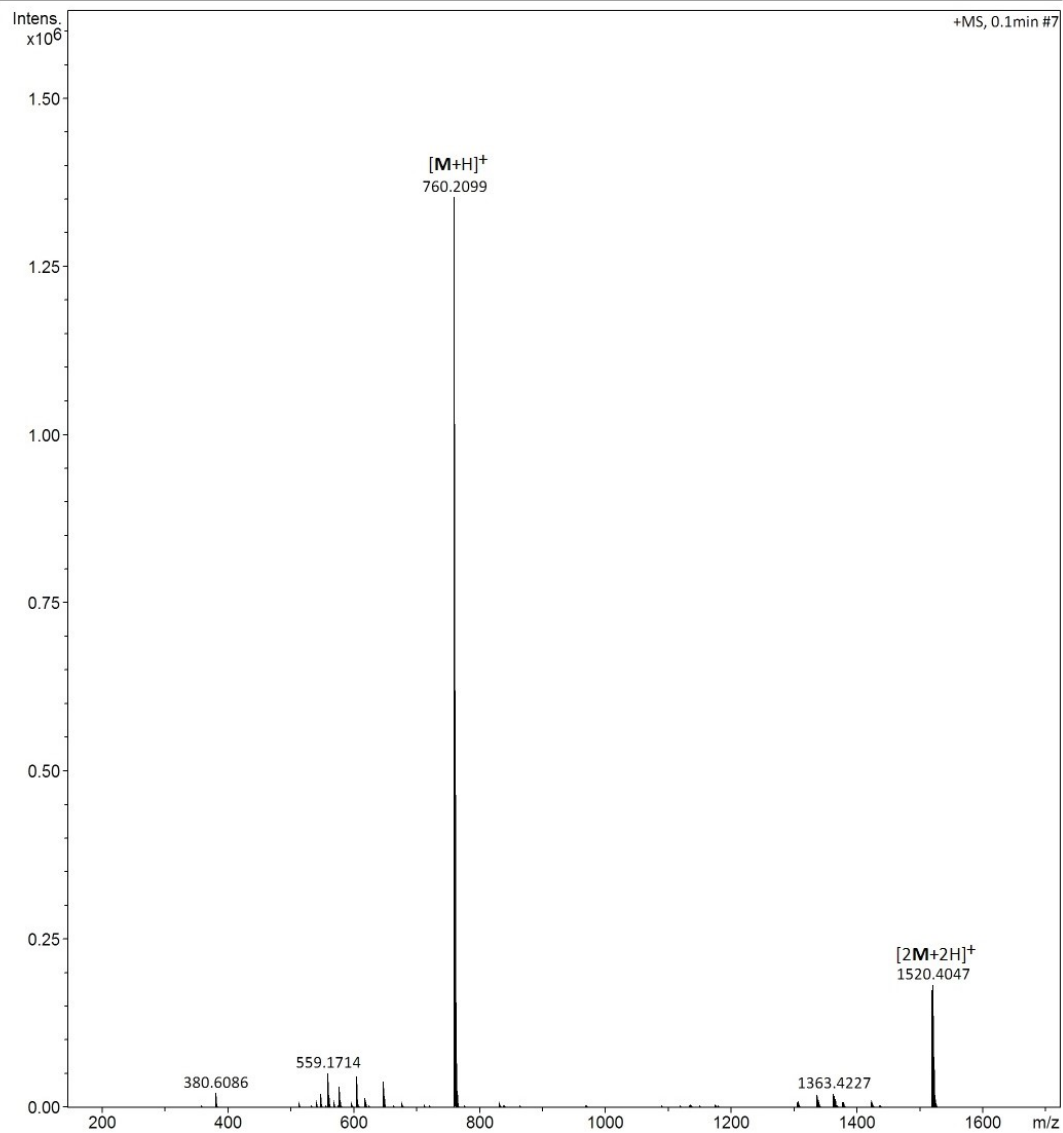

**Figure S5.** ESI-MS spectrum of **TMe** in positive ion mode.

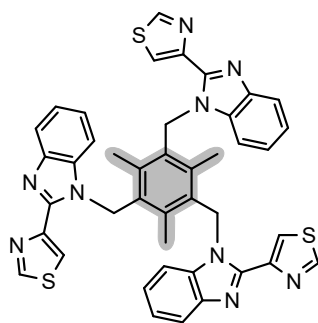

TMe

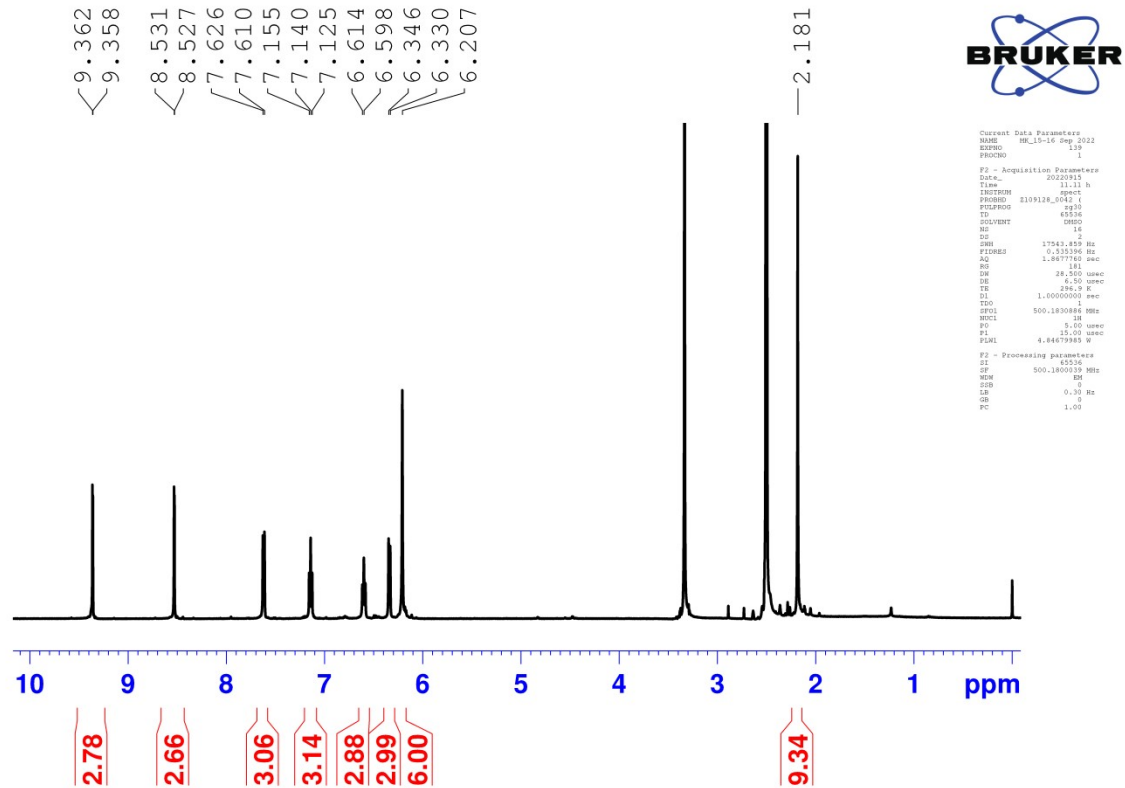

Figure S6. <sup>1</sup>H NMR spectrum of TMe in DMSO-d<sub>6</sub>.

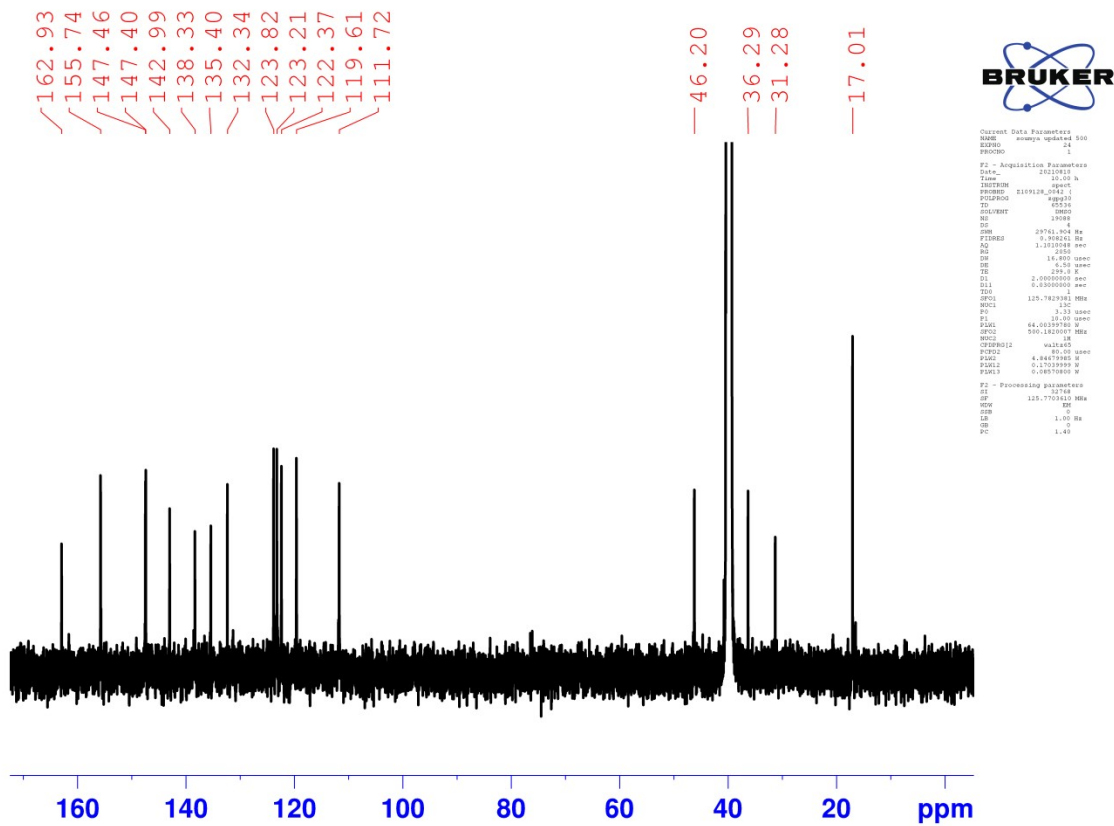

**Figure S7.**  $^{13}\text{C}$  NMR spectrum of **TMe** in  $\text{DMSO-}d_6$ .

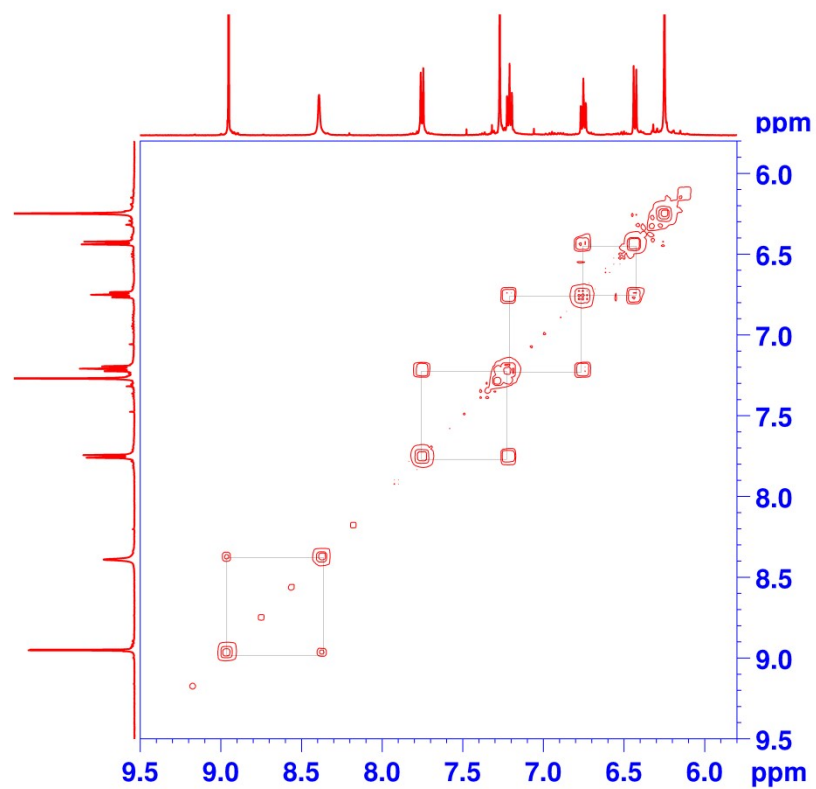

**Figure S8.** Partial  $^1\text{H}$ - $^1\text{H}$  COSY NMR spectrum of **TMe** in  $\text{CDCl}_3$ .

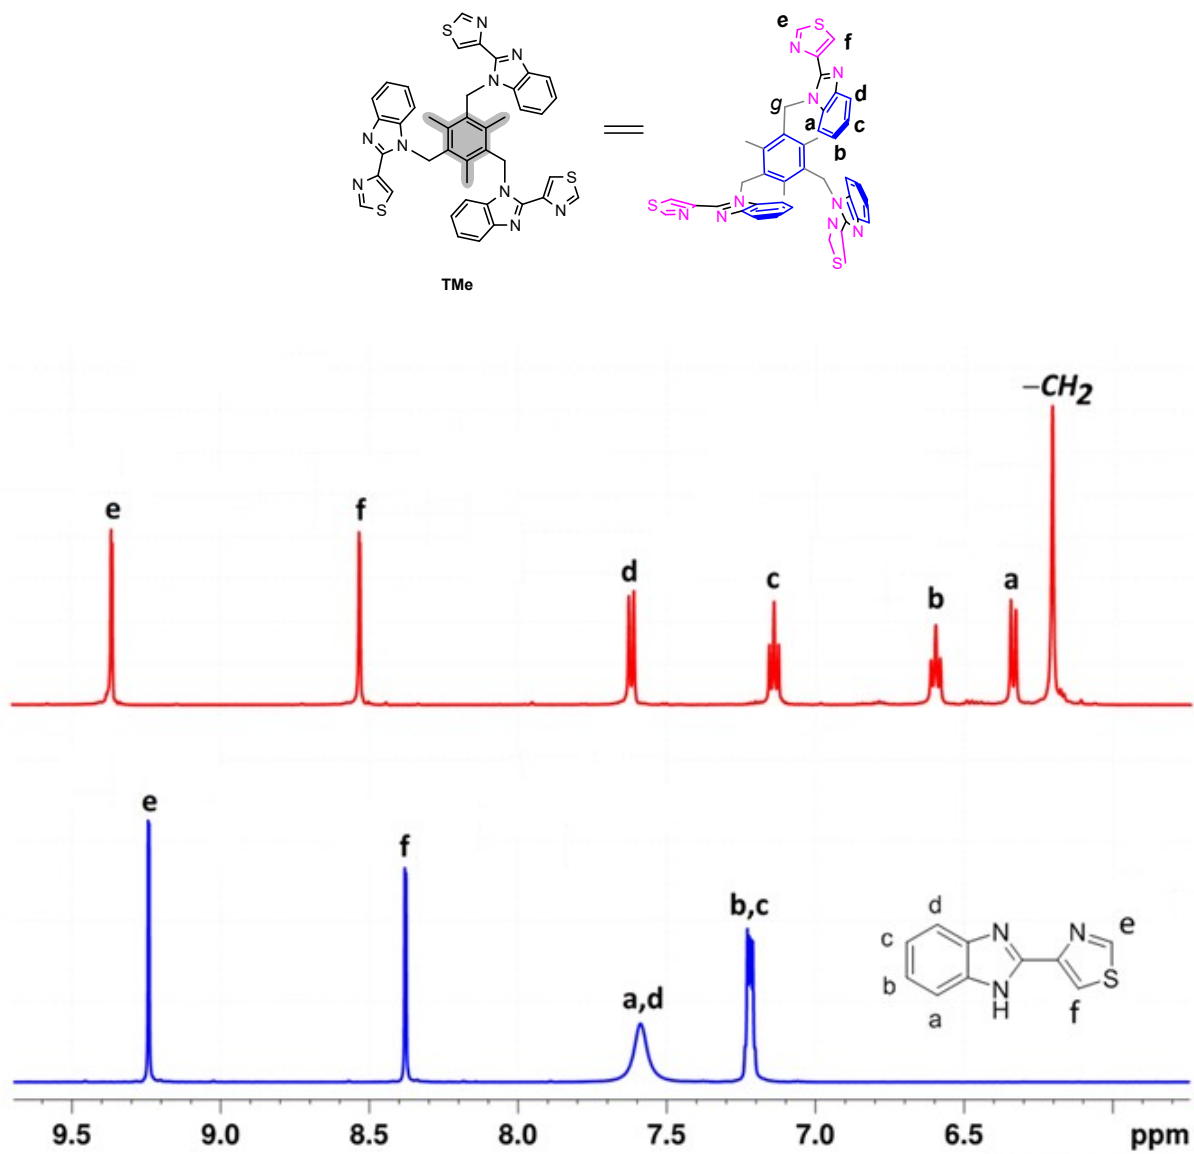

**Figure S9.** Partial  $^1\text{H}$  NMR spectra of H-Tzbim and TMe (top) in  $\text{DMSO-}d_6$ .

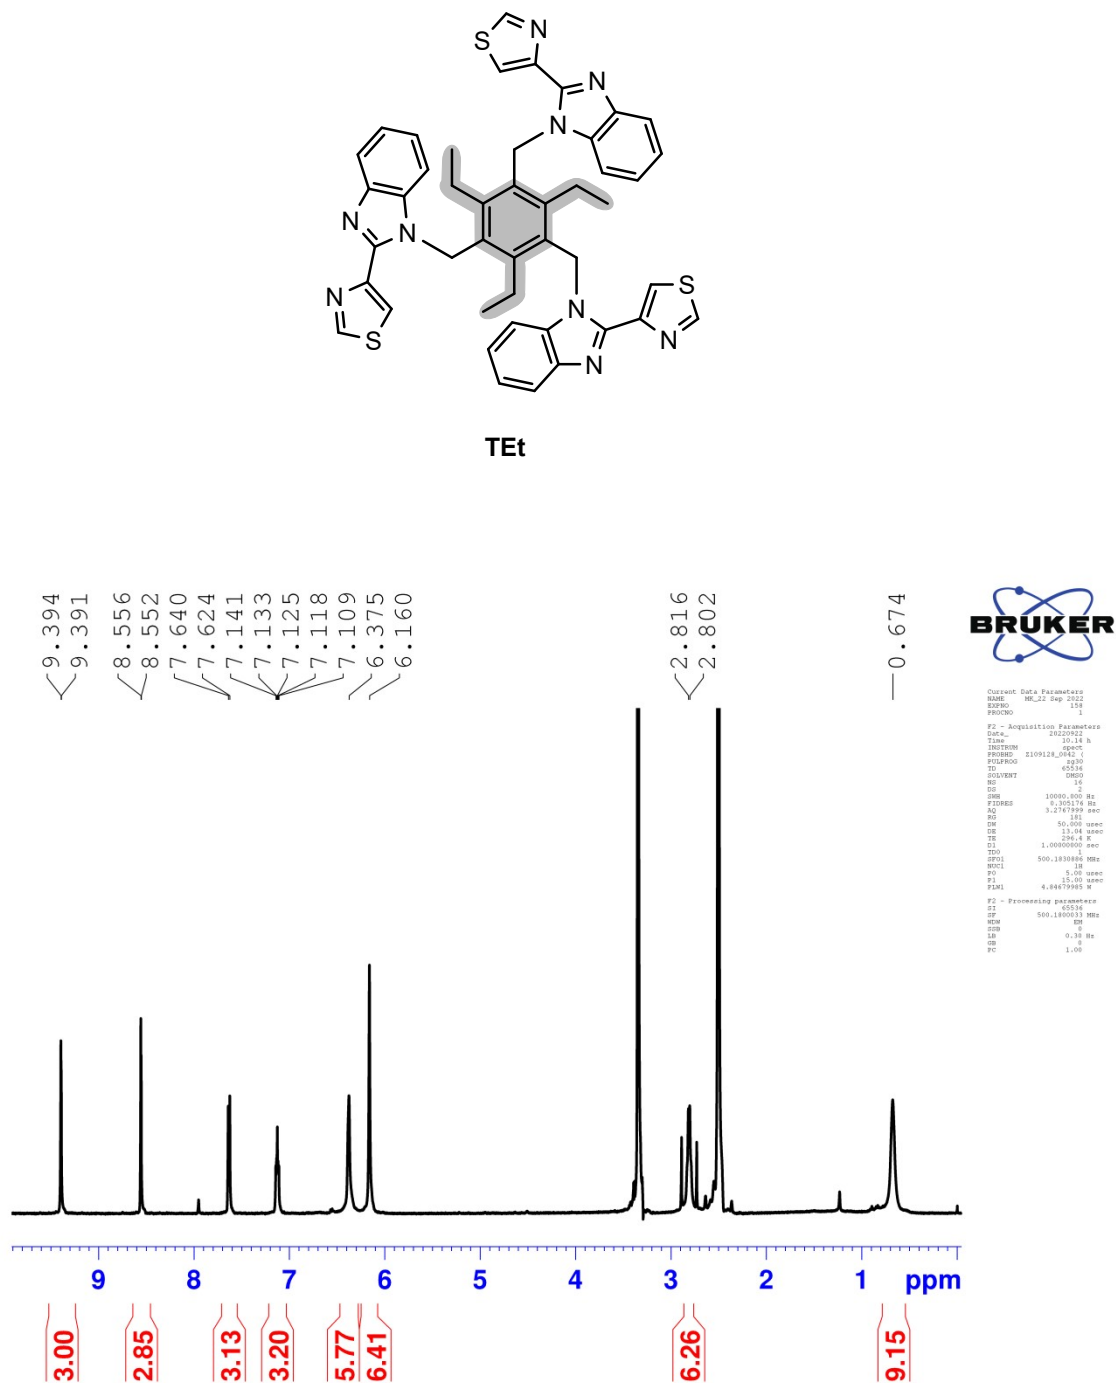

Figure S10. <sup>1</sup>H NMR spectrum of TET in DMSO-*d*<sub>6</sub>.

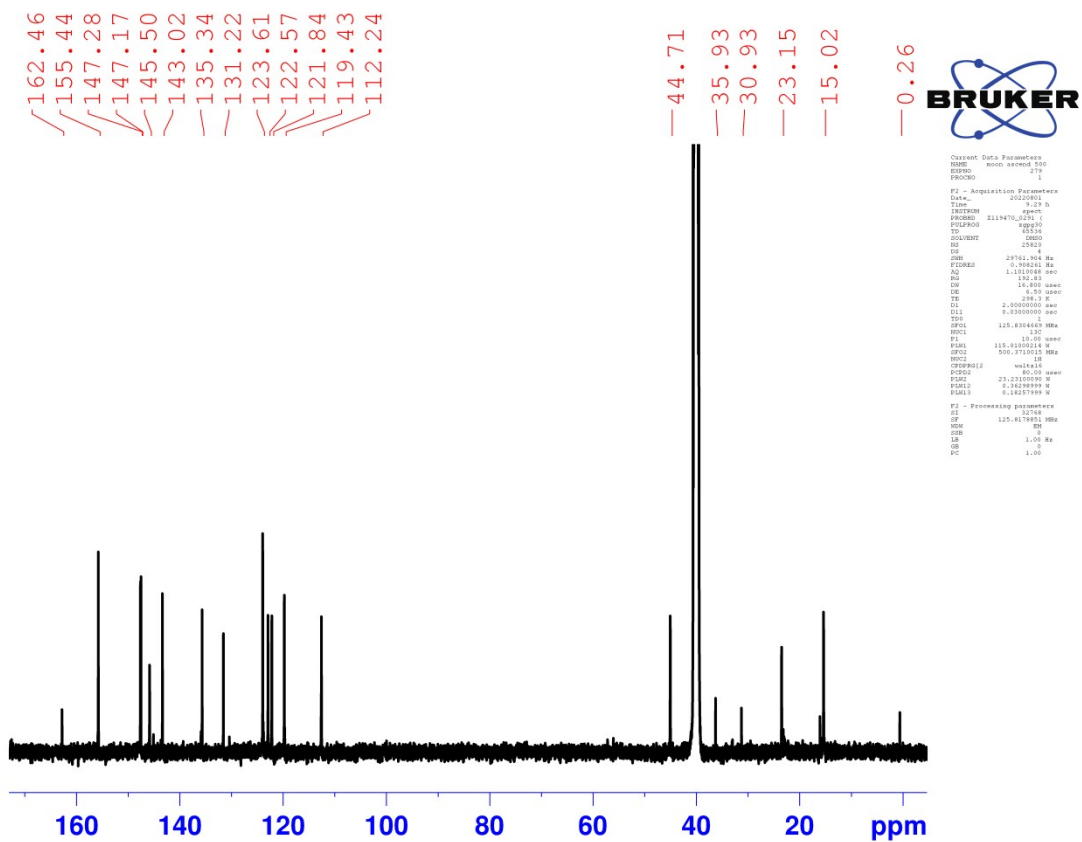

Figure S11.  $^{13}\text{C}$  NMR spectrum of TEt in  $\text{DMSO-}d_6$ .



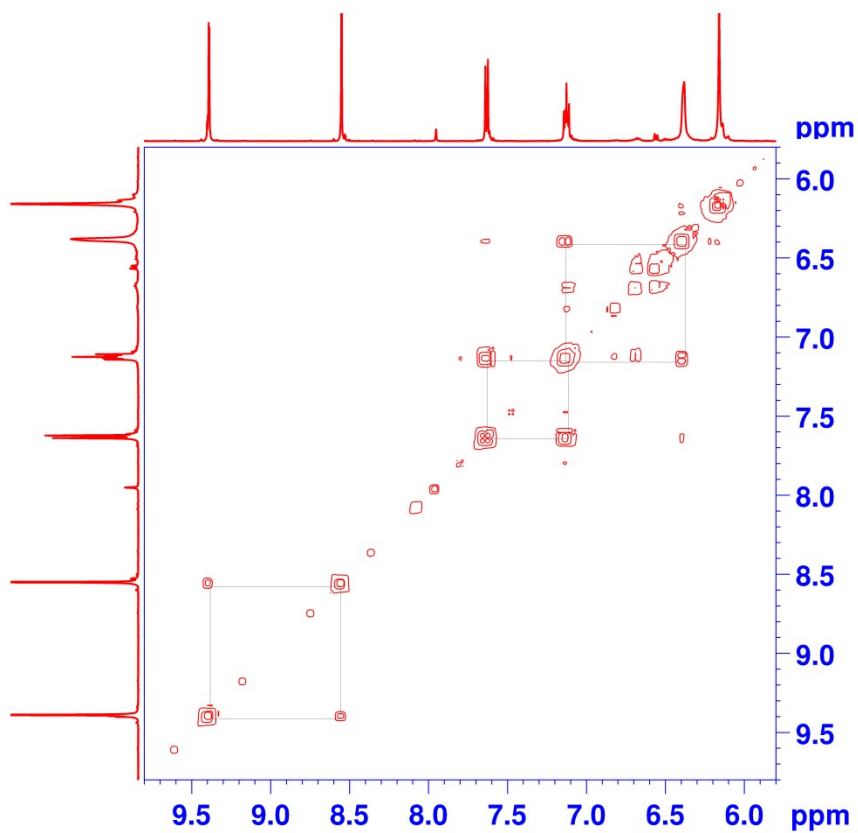

**Figure S12.** Partial <sup>1</sup>H–<sup>1</sup>H COSY NMR spectrum of **TEt** in DMSO-*d*<sub>6</sub>.

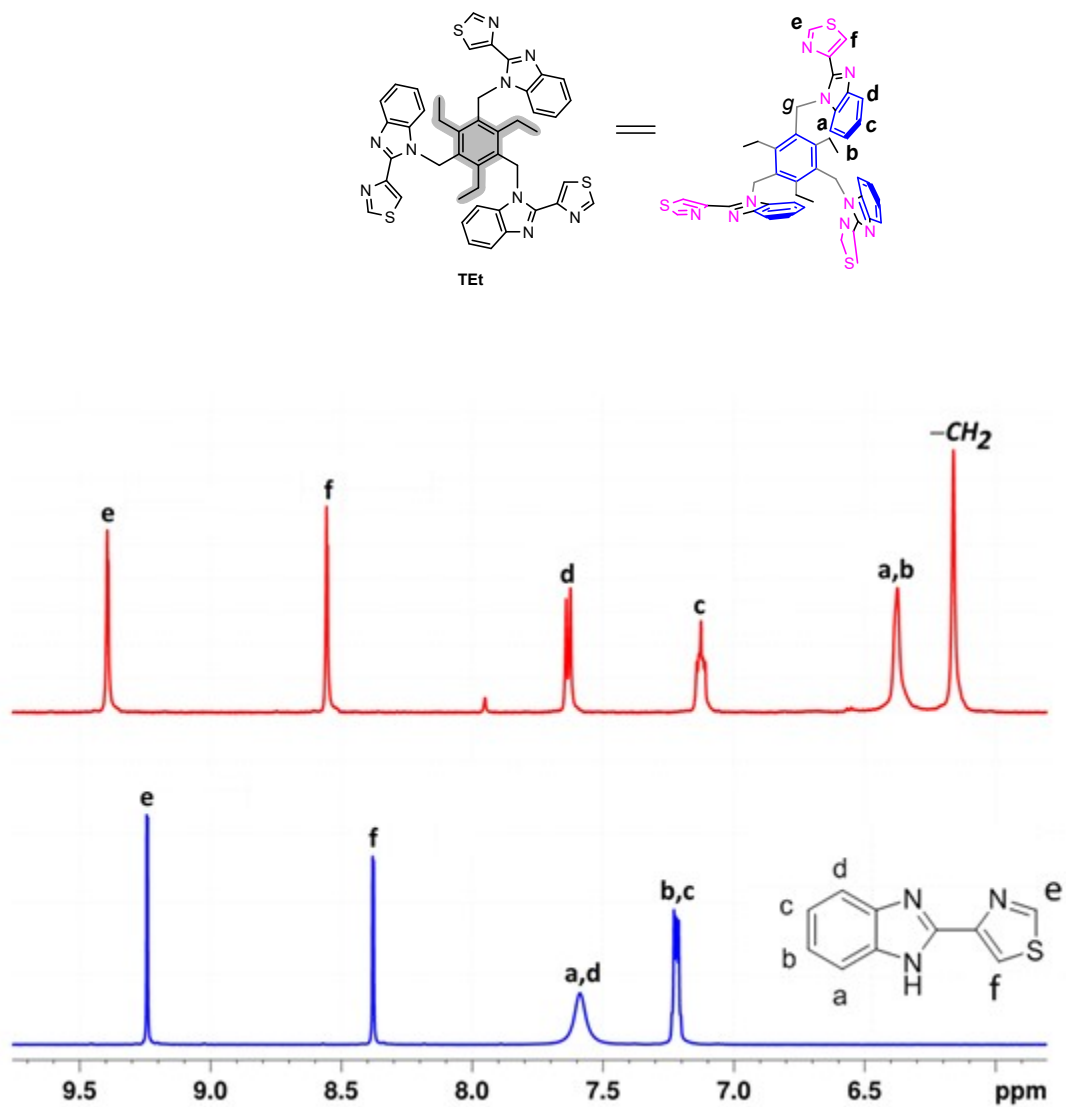

**Figure S13.** Partial  $^1\text{H}$  NMR of spectra of H-Tzbim and TET (top) in  $\text{DMSO}-d_6$ .

**Acquisition Parameter**

|             |            |                      |          |                  |           |
|-------------|------------|----------------------|----------|------------------|-----------|
| Source Type | ESI        | Ion Polarity         | Positive | Set Nebulizer    | 0.3 Bar   |
| Focus       | Not active | Set Capillary        | 1200 V   | Set Dry Heater   | 240 °C    |
| Scan Begin  | 50 m/z     | Set End Plate Offset | -500 V   | Set Dry Gas      | 4.0 l/min |
| Scan End    | 2580 m/z   | Set Charging Voltage | 0 V      | Set Divert Valve | Waste     |
|             |            | Set Corona           | 0 nA     | Set APCI Heater  | 0 °C      |

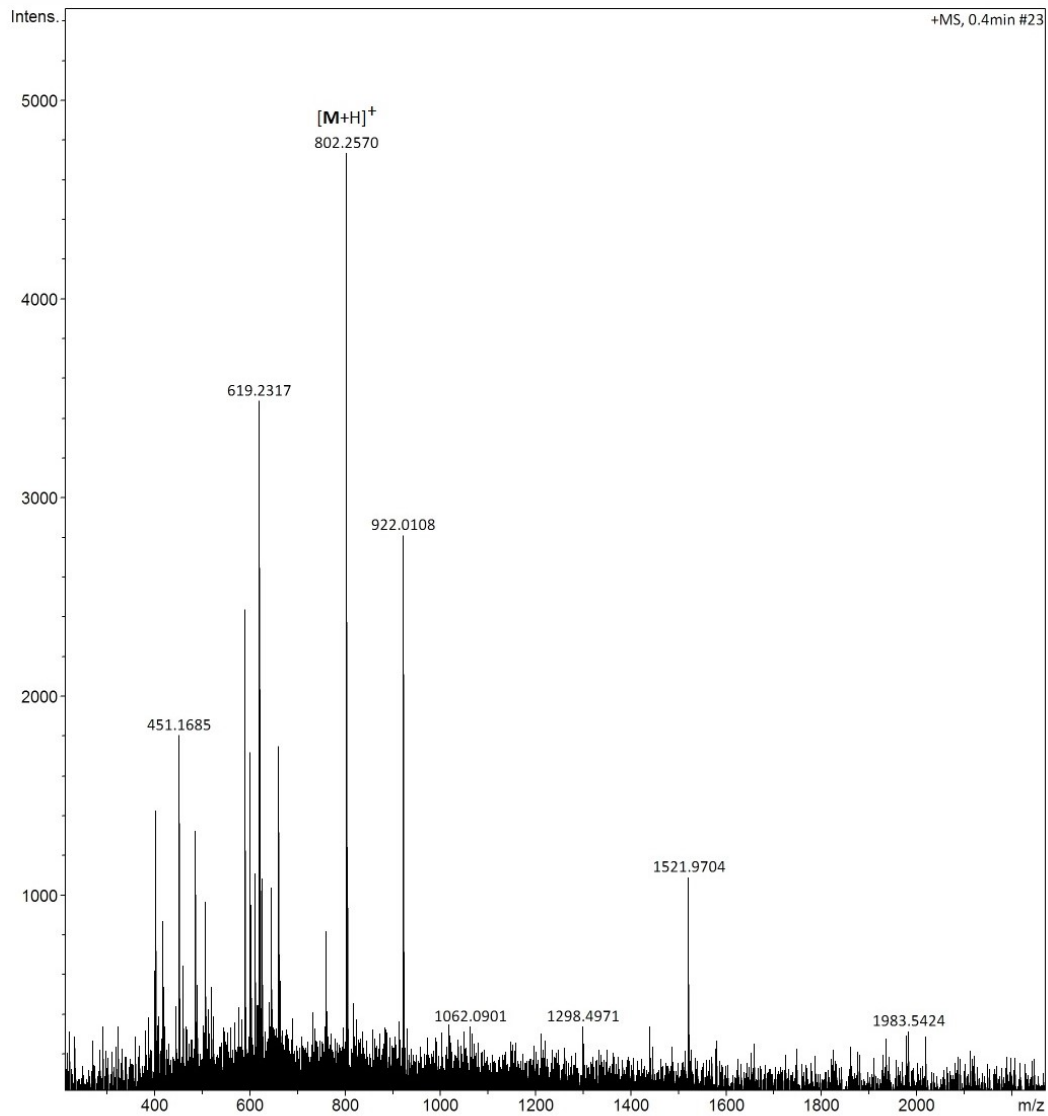

**Figure S14.** ESI-MS spectrum of TET in positive ion mode.

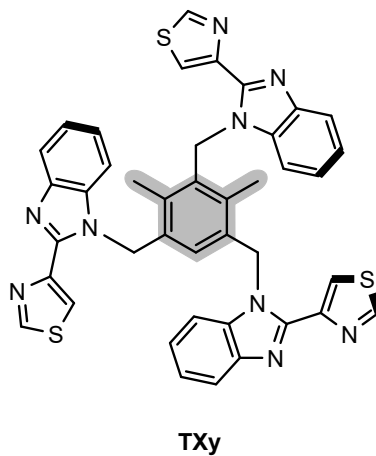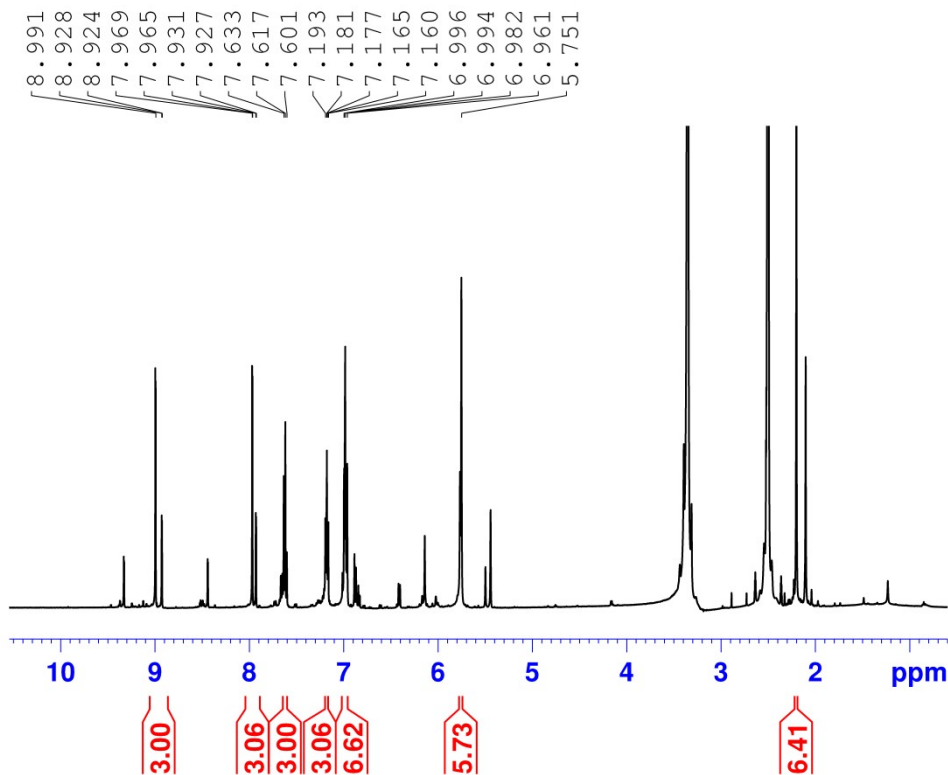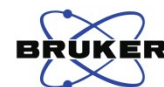

```

Current Data Parameters
NAME      MR_21-sep-200
EXPNO    1
PROCNO   1

F2 - Acquisition Parameters
Date_    20230903
Time     16:10 h
INSTRUM  spect
PROBHD   1H1
PULPROG  zgpg30
TD        65536
SOLVENT  DMSO
NS        256
DS        2
SWH       10000.000 Hz
FIDRES   0.1605178 Hz
AQ        3.2747993 sec
RG         381
SFO       500.000 MHz
DE        23.04 uMm
TE        300.2 K
D1        1.80000000 sec
TDO       1
2DPO1    500.183086 MHz
NUC1      1H
P0        5.00 uMm
F1        35.00 uMm
F2        4.84479945 W

F2 - Processing parameters
SI        65536
SF        500.1800709 MHz
WDW       EM
SSB       0
LB        0.30 Hz
GB        0
PC        1.00
  
```

**Figure S15.**  $^1\text{H}$  NMR spectrum of TXY in  $\text{DMSO-}d_6$ .

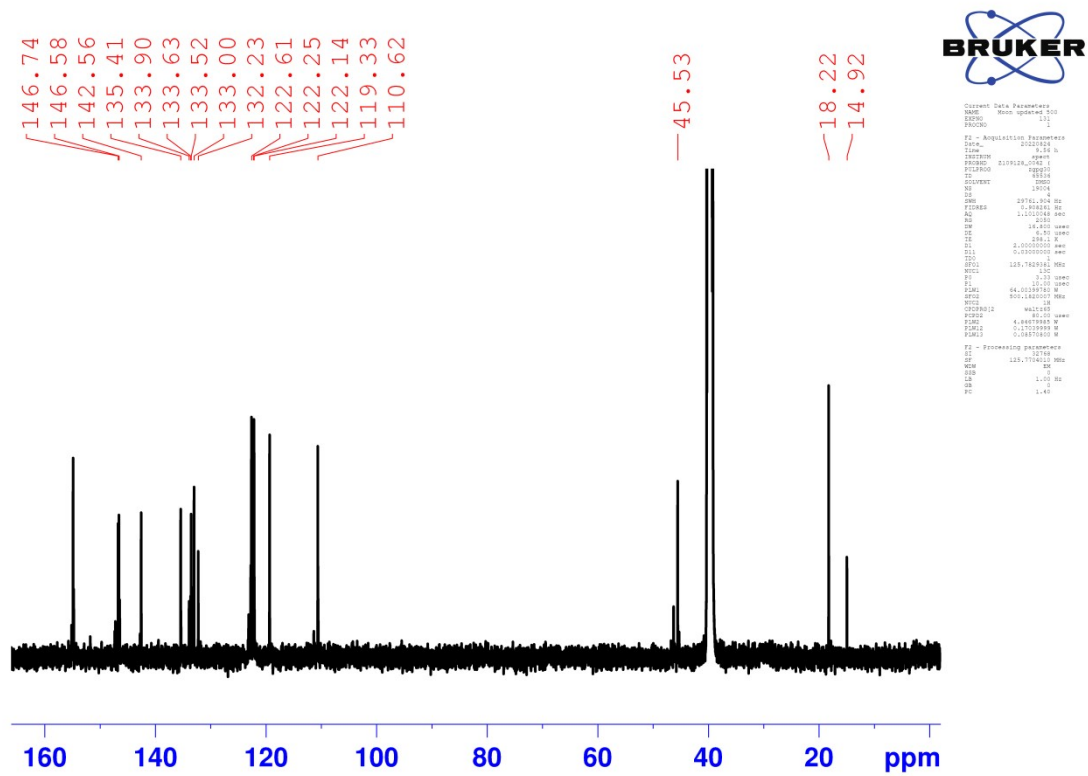

Figure S17. <sup>13</sup>C NMR spectrum of TXY in DMSO-*d*<sub>6</sub>.

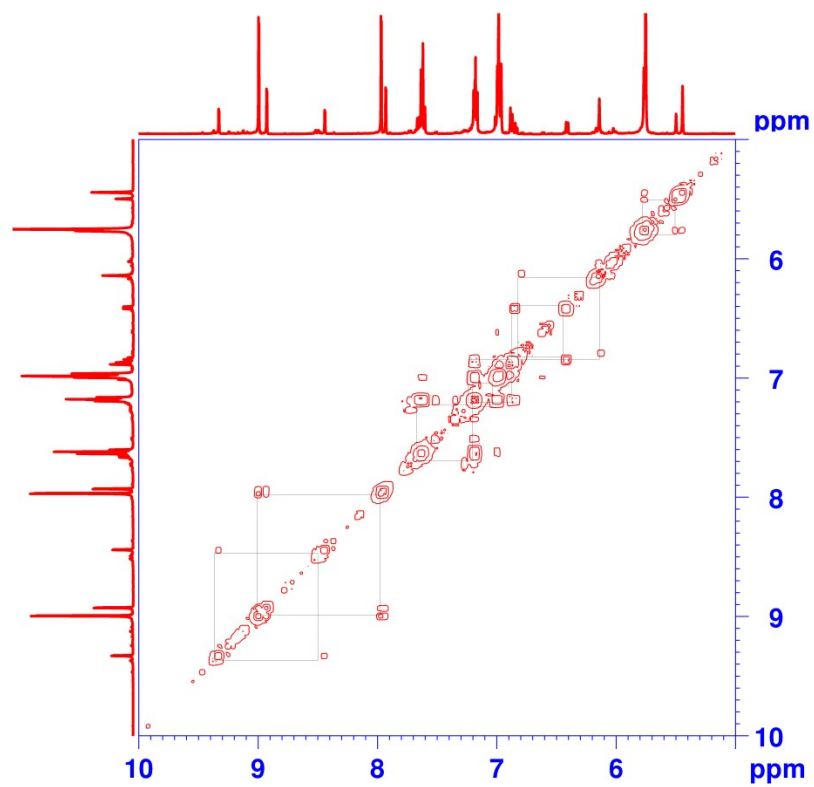

**Figure S16.** Partial  $^1\text{H}$ - $^1\text{H}$  COSY NMR spectrum of **TXy** in  $\text{DMSO-}d_6$ .

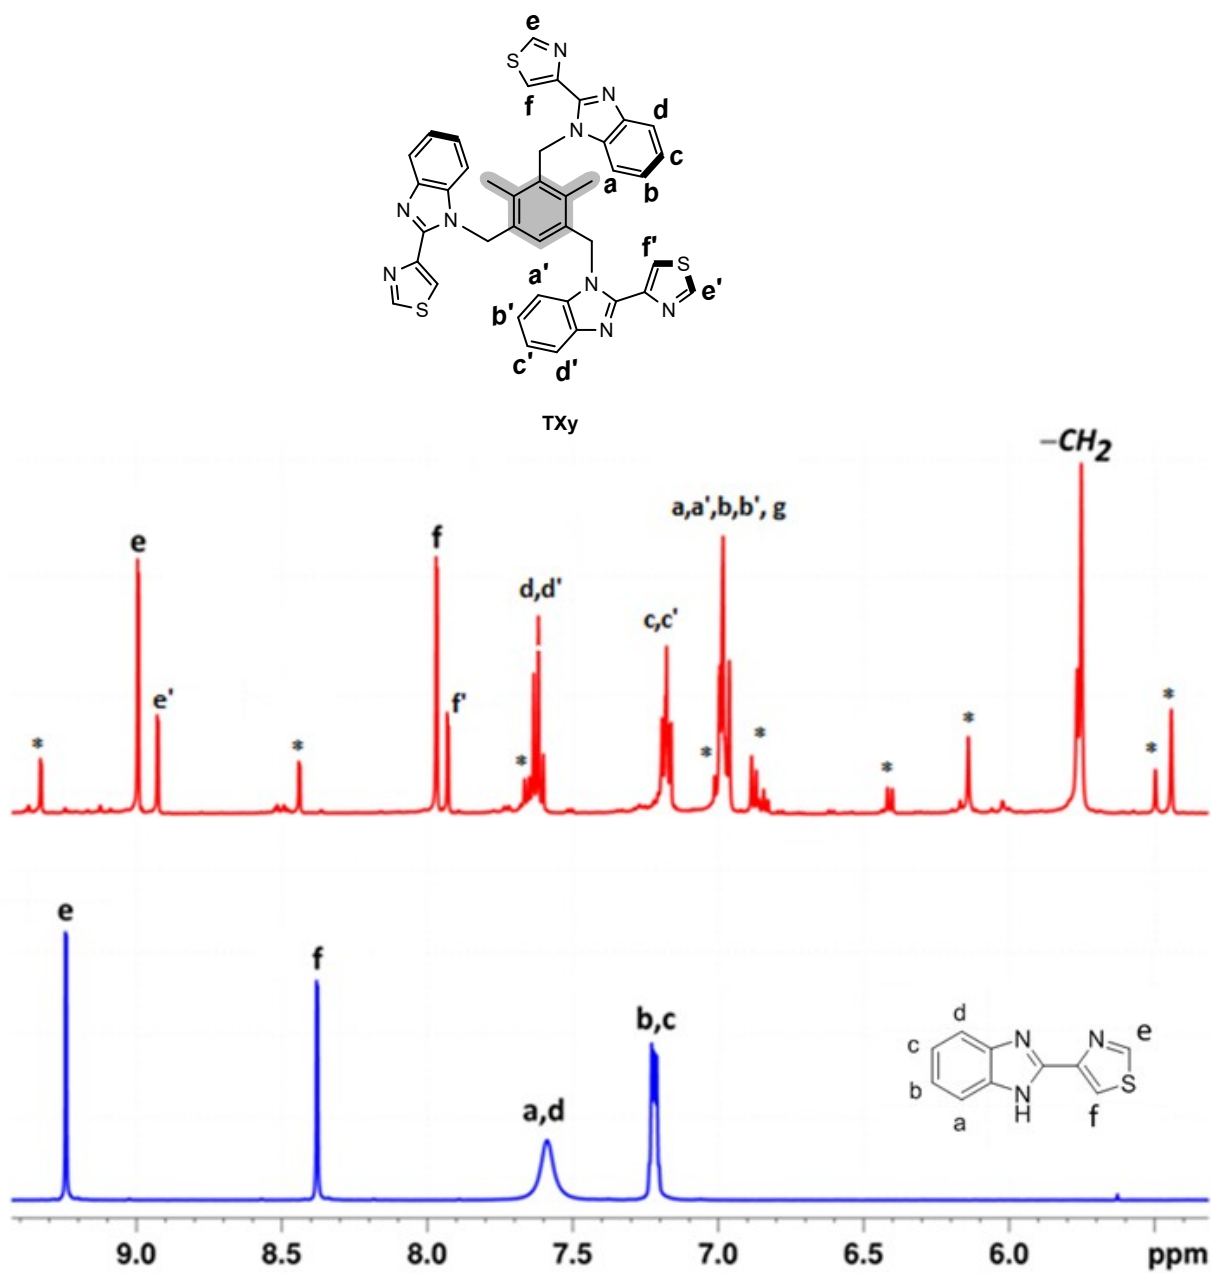

**Figure S18.** Partial  $^1\text{H}$  NMR spectra of H-Tzbim and TXy in  $\text{DMSO-}d_6$ .

**Acquisition Parameter**

|             |            |                      |          |                  |           |
|-------------|------------|----------------------|----------|------------------|-----------|
| Source Type | ESI        | Ion Polarity         | Positive | Set Nebulizer    | 0.3 Bar   |
| Focus       | Not active | Set Capillary        | 3000 V   | Set Dry Heater   | 180 °C    |
| Scan Begin  | 50 m/z     | Set End Plate Offset | -500 V   | Set Dry Gas      | 4.0 l/min |
| Scan End    | 2500 m/z   | Set Charging Voltage | 0 V      | Set Divert Valve | Waste     |
|             |            | Set Corona           | 0 nA     | Set APCI Heater  | 0 °C      |

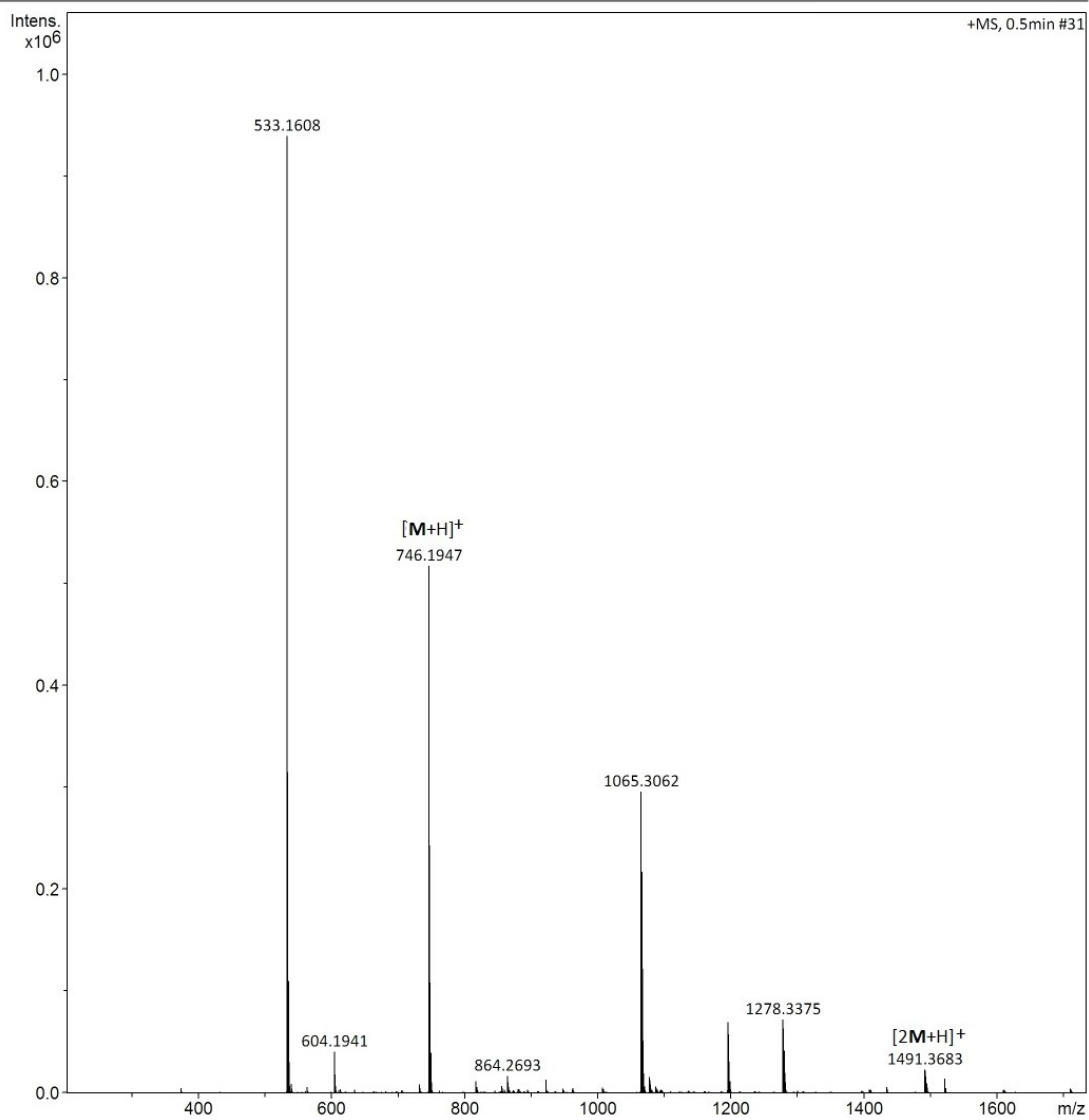

**Figure S19.** ESI-MS spectrum of TXy in positive ion mode.



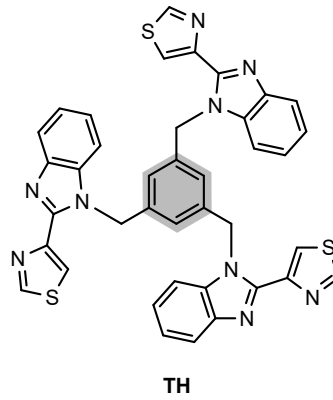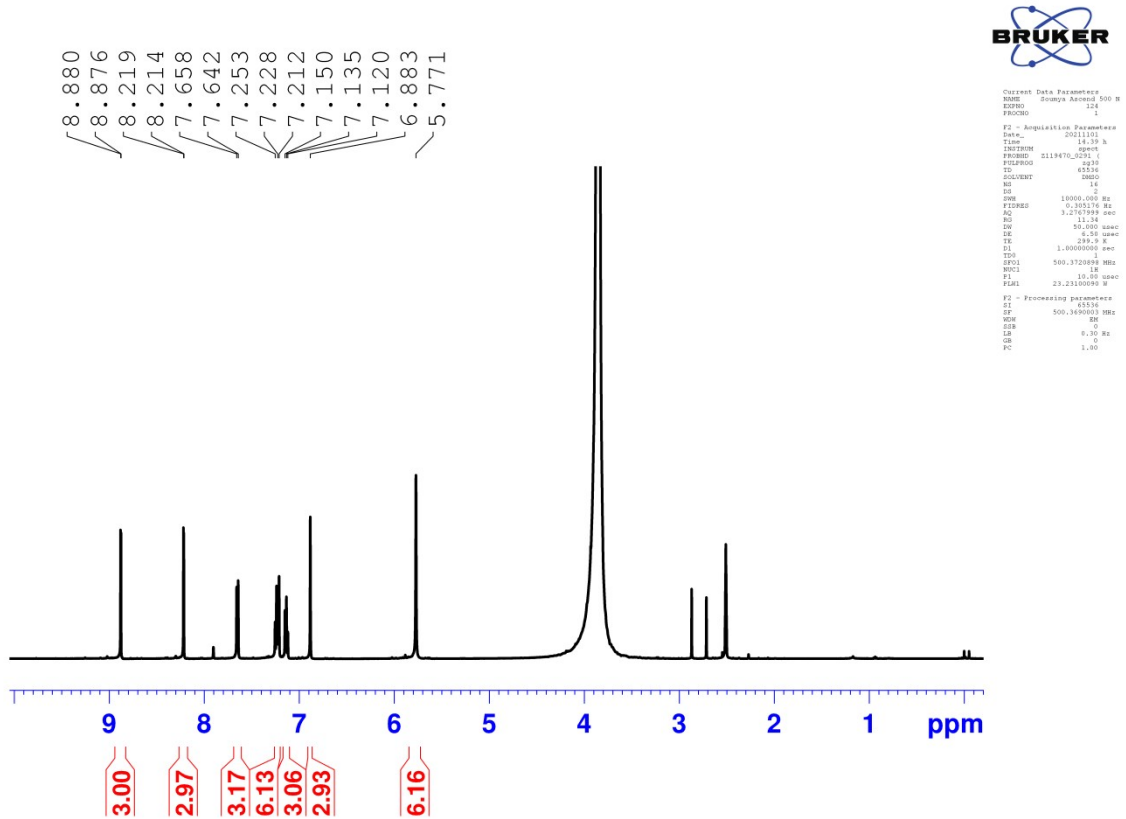

**Figure S20.**  $^1\text{H}$  NMR spectrum of **TH** in  $\text{DMSO-}d_6$ .

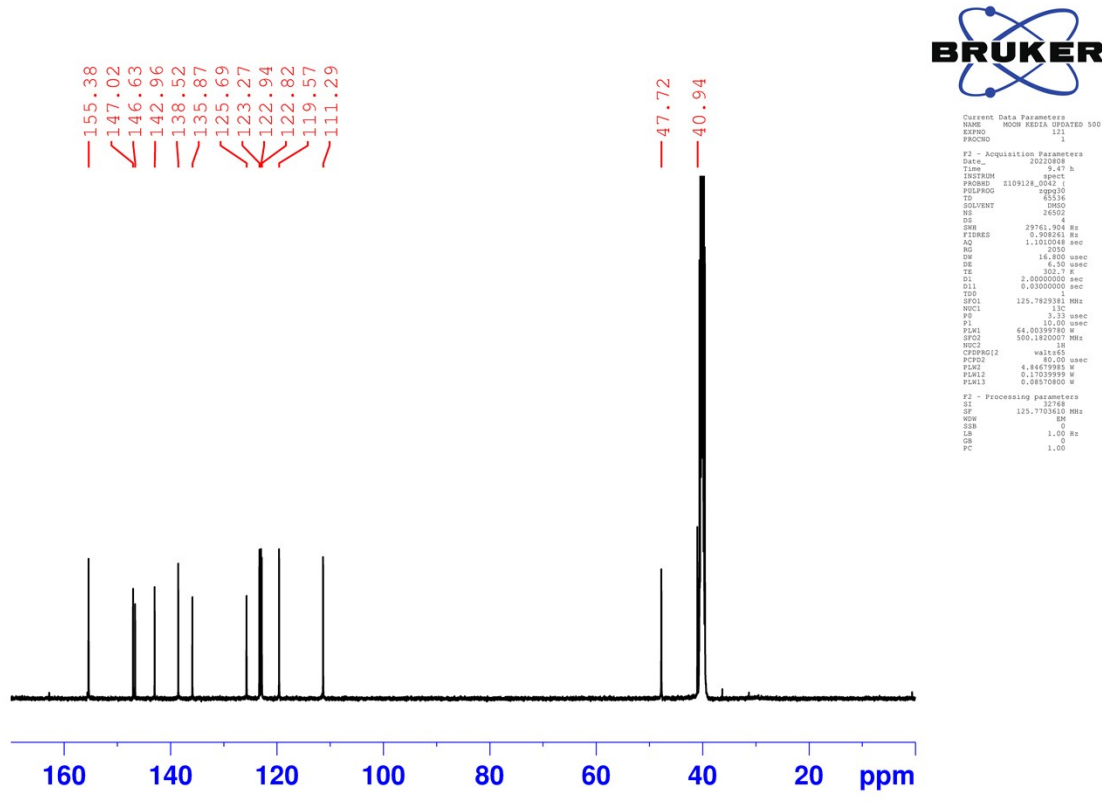

Figure S21. <sup>13</sup>C NMR spectrum of TH in DMSO-*d*<sub>6</sub>.

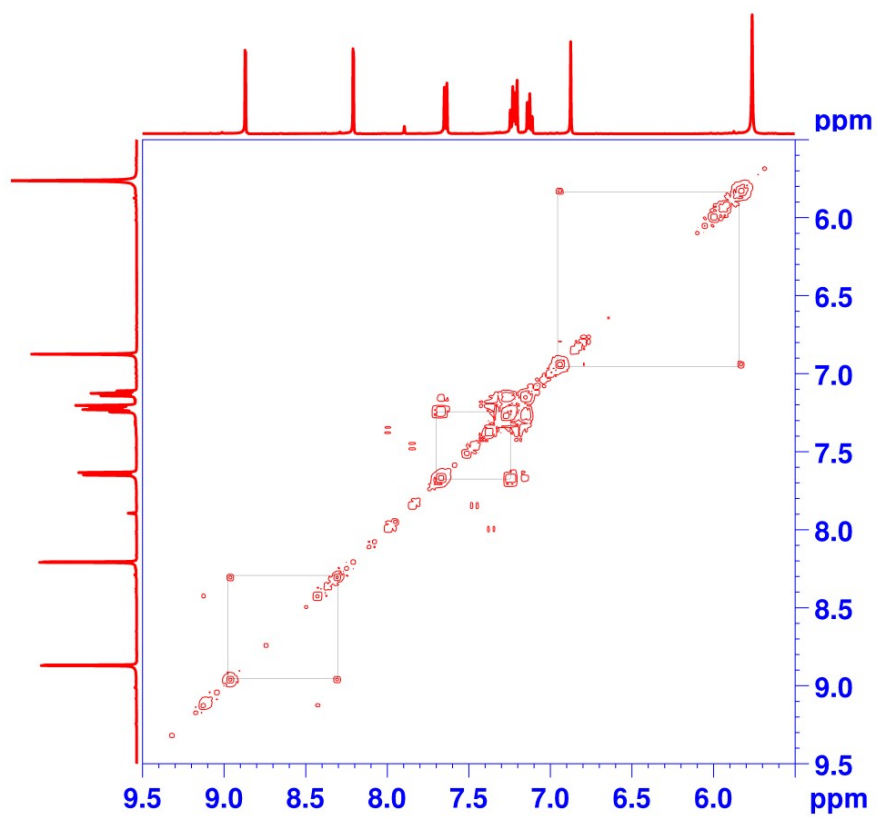

**Figure S22.** Partial  $^1\text{H}$ - $^1\text{H}$  COSY NMR spectrum of **TH** in  $\text{DMSO-}d_6$ .

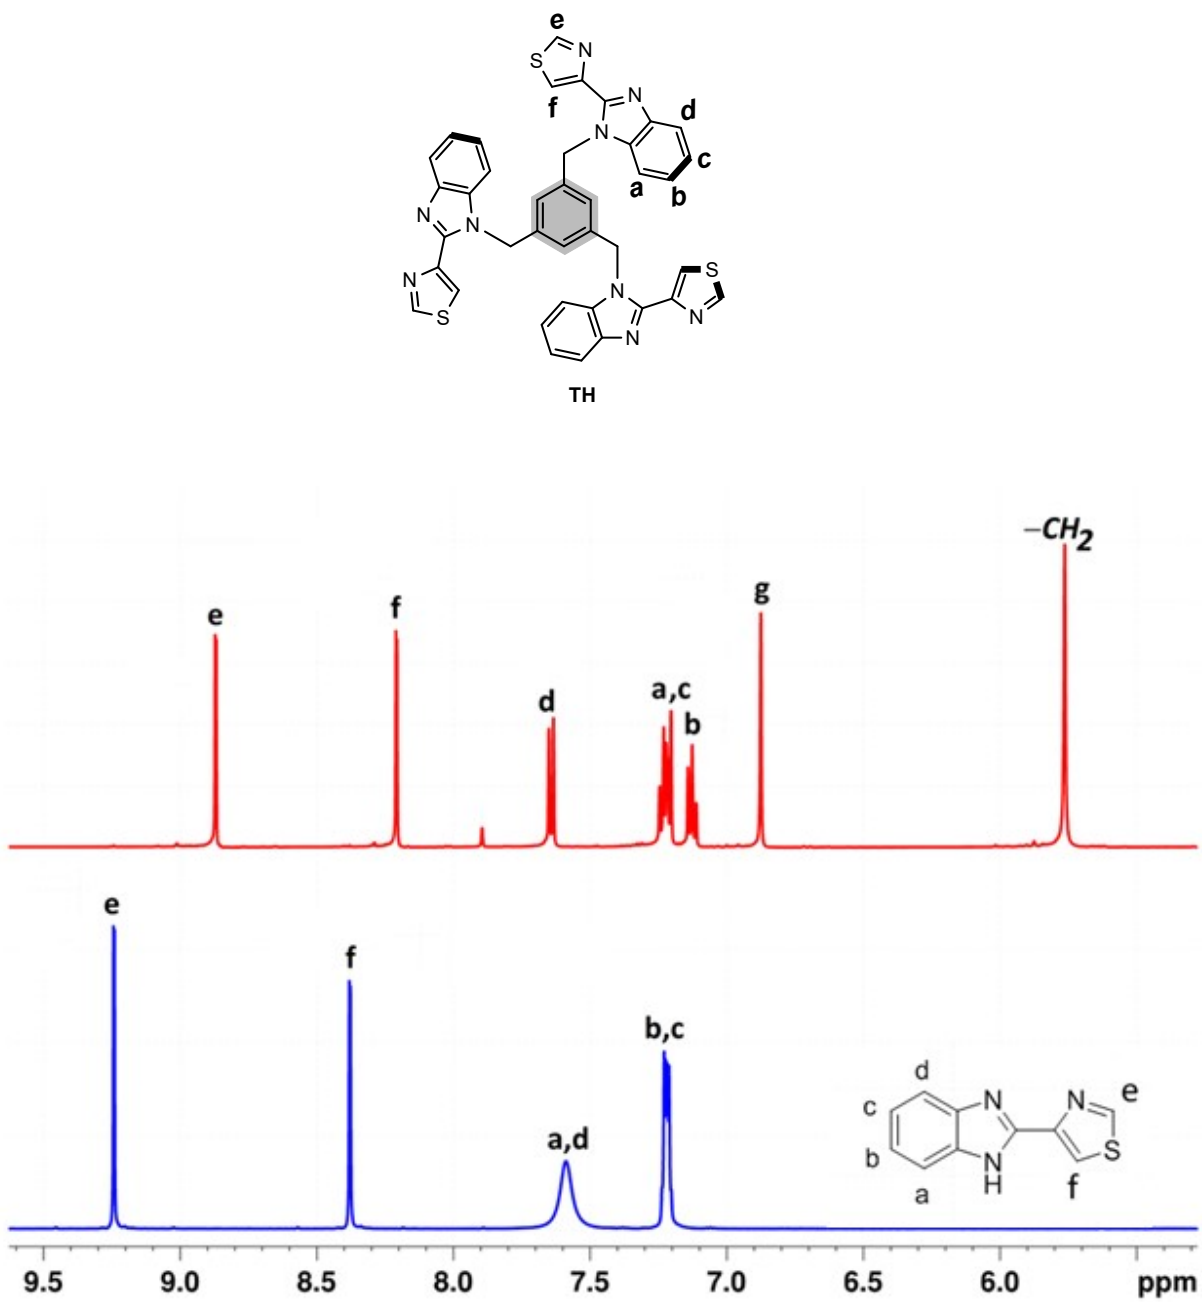

**Figure S23.** Partial  $^1\text{H}$  NMR spectra of H-Tzbim and **TH** in  $\text{DMSO}-d_6$ .

| Acquisition Parameter |            |                      |          |                  |           |
|-----------------------|------------|----------------------|----------|------------------|-----------|
| Source Type           | ESI        | Ion Polarity         | Positive | Set Nebulizer    | 0.3 Bar   |
| Focus                 | Not active | Set Capillary        | 4500 V   | Set Dry Heater   | 180 °C    |
| Scan Begin            | 50 m/z     | Set End Plate Offset | -500 V   | Set Dry Gas      | 4.0 l/min |
| Scan End              | 2000 m/z   | Set Charging Voltage | 0 V      | Set Divert Valve | Waste     |
|                       |            | Set Corona           | 0 nA     | Set APCI Heater  | 0 °C      |

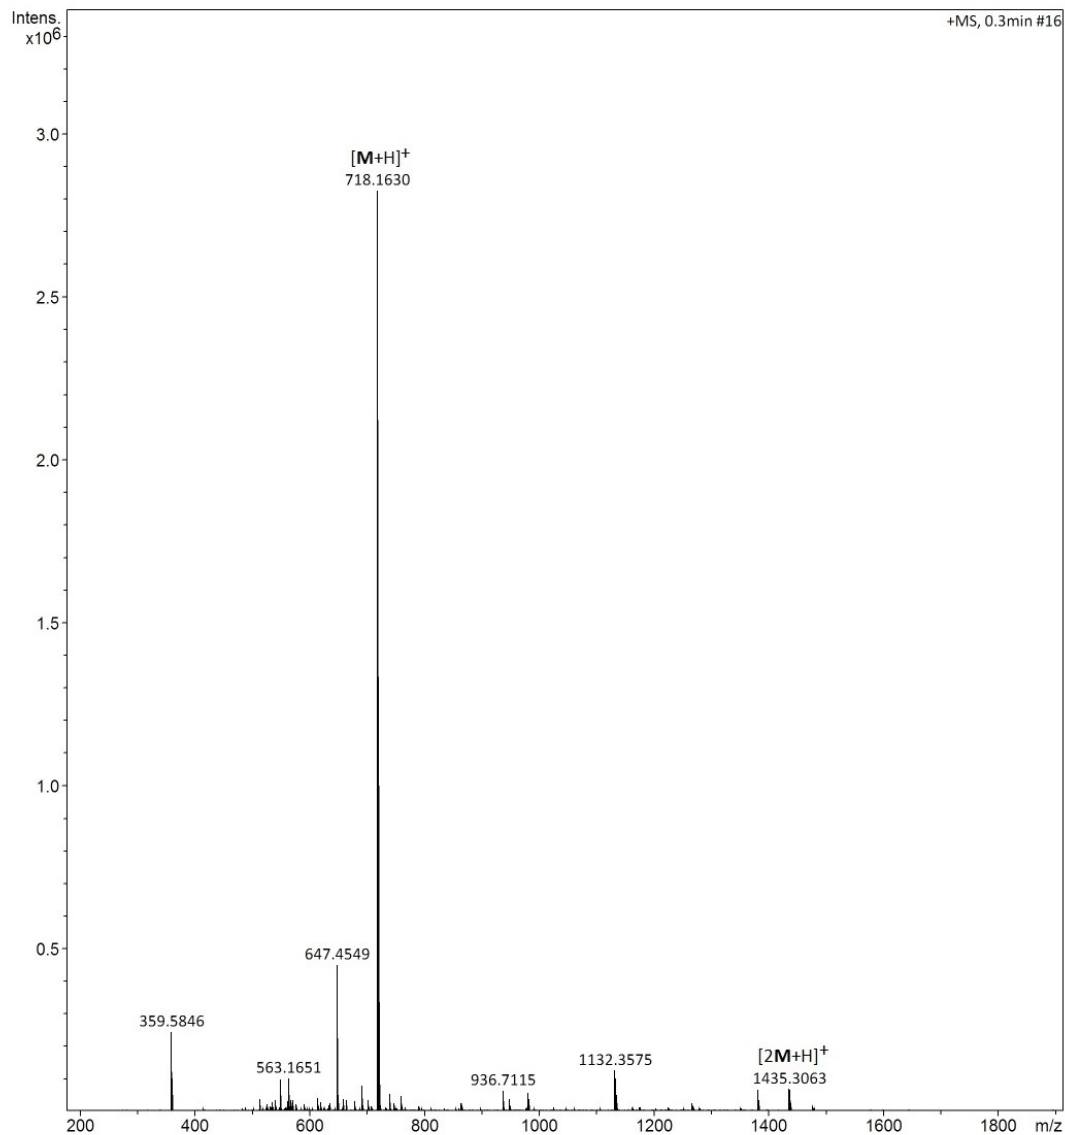

Figure S24. ESI-MS spectrum of TH in positive ion mode.

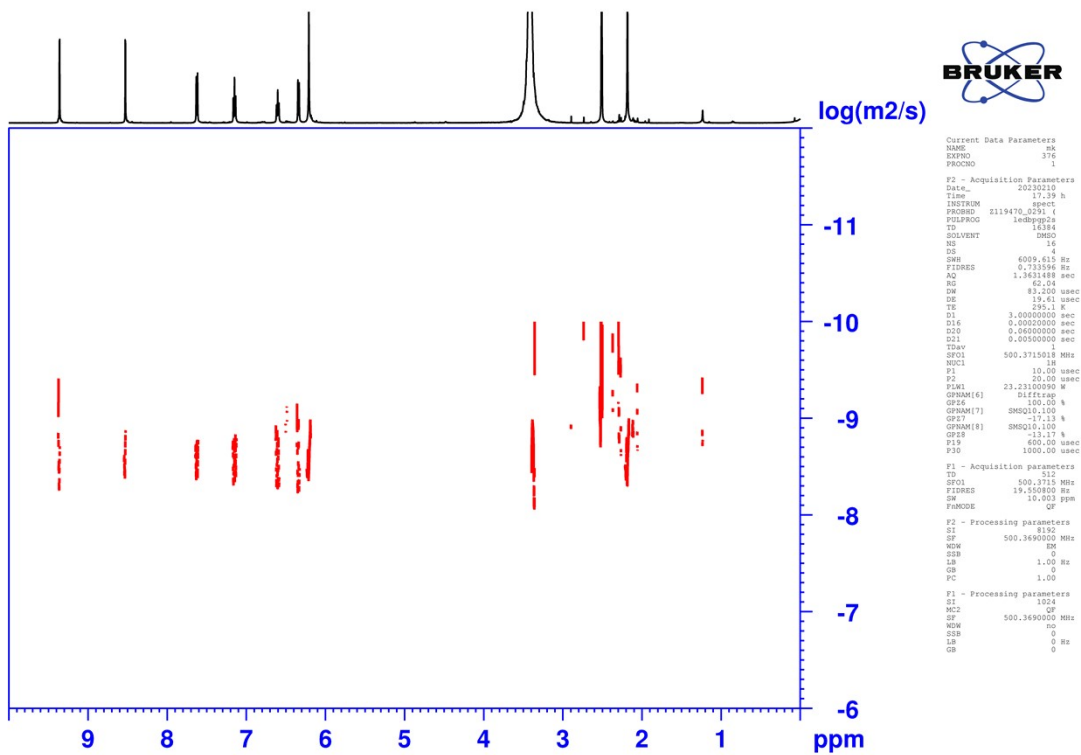

Figure S25. Partial  $^1\text{H}$ - $^1\text{H}$  DOSY NMR spectrum of TMe in  $\text{DMSO-}d_6$ .

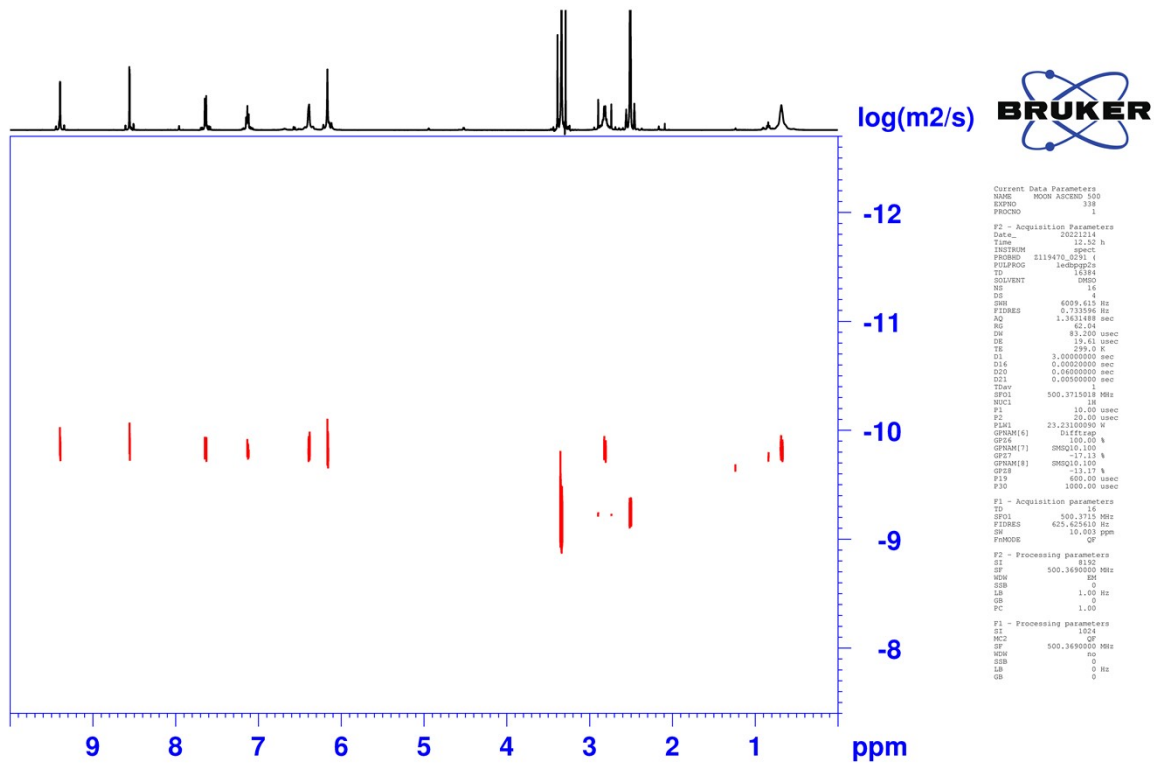

**Figure S26.** Partial <sup>1</sup>H-<sup>1</sup>H DOSY NMR spectrum of TEt in DMSO-*d*<sub>6</sub>.

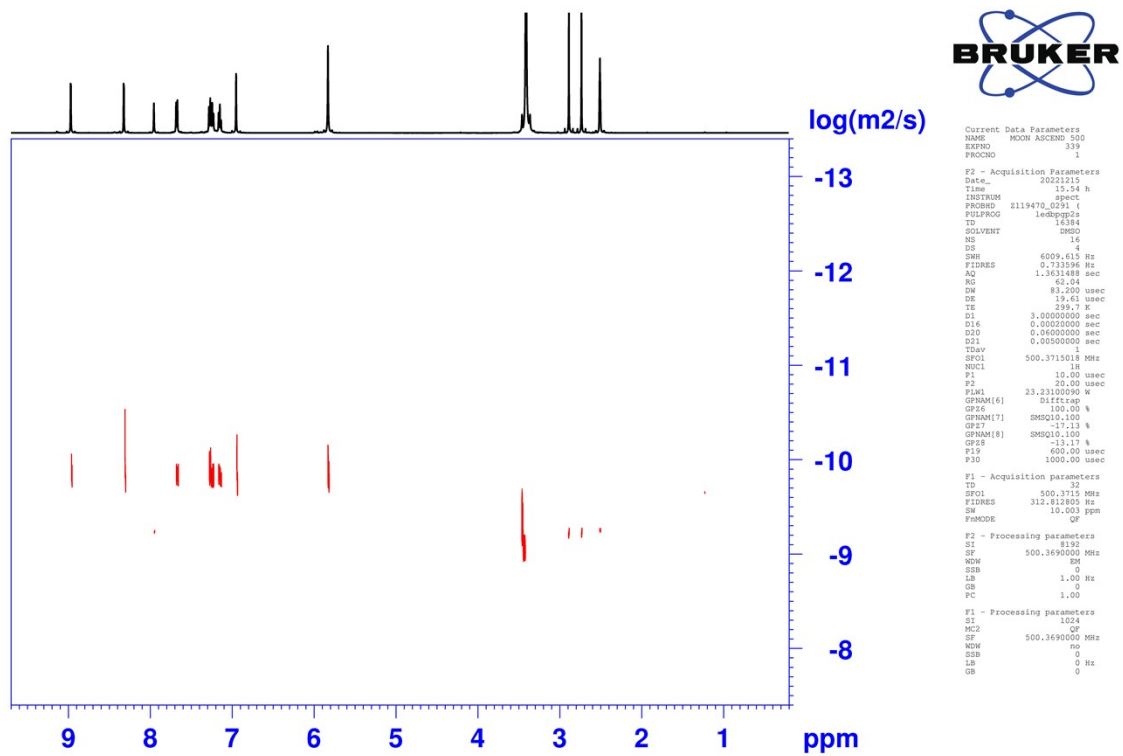

Figure S27. Partial  $^1\text{H}$ - $^1\text{H}$  DOSY NMR spectrum of TXy in  $\text{DMSO-}d_6$ .



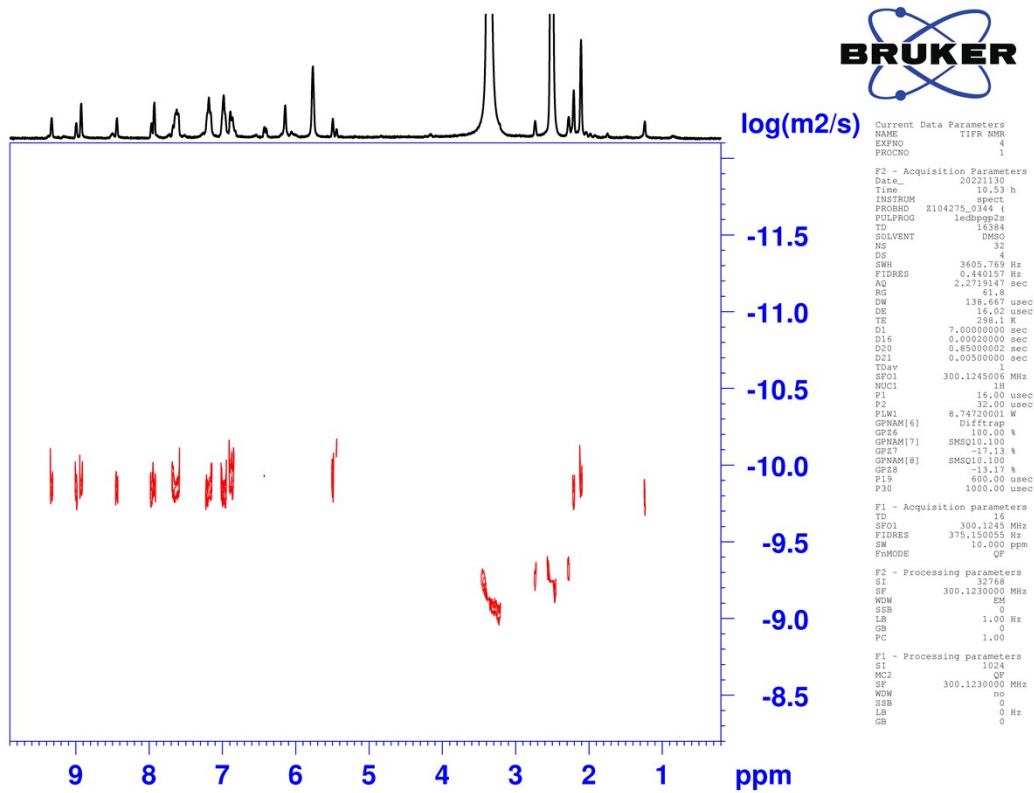

**Figure S28.** Partial  $^1\text{H}$ - $^1\text{H}$  DOSY NMR spectrum of **TH** in  $\text{DMSO-}d_6$ .

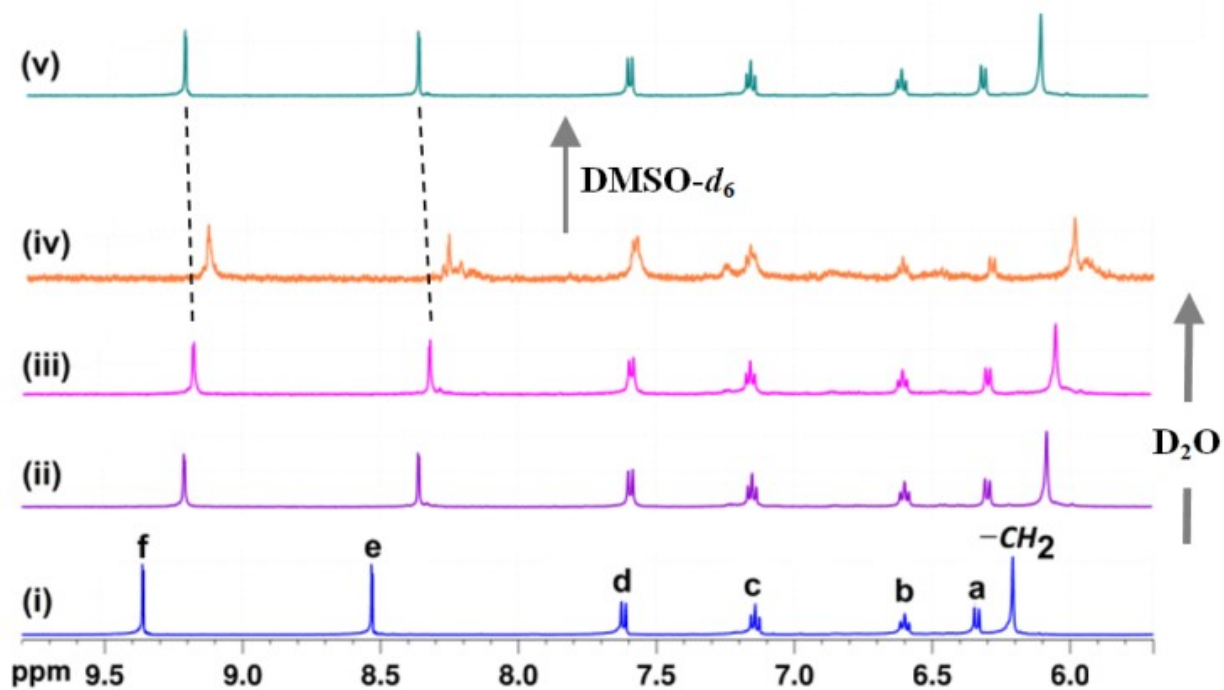

**Figure S29.**  $^1\text{H-NMR}$  titration at 298 K of **TMe** in  $\text{DMSO-}d_6/\text{D}_2\text{O}$  mixture in the following vol/vol ratio (i) 100:0, (ii) 77:23, (iii) 71:29, (iv) 56:44 and (v) 71:29.

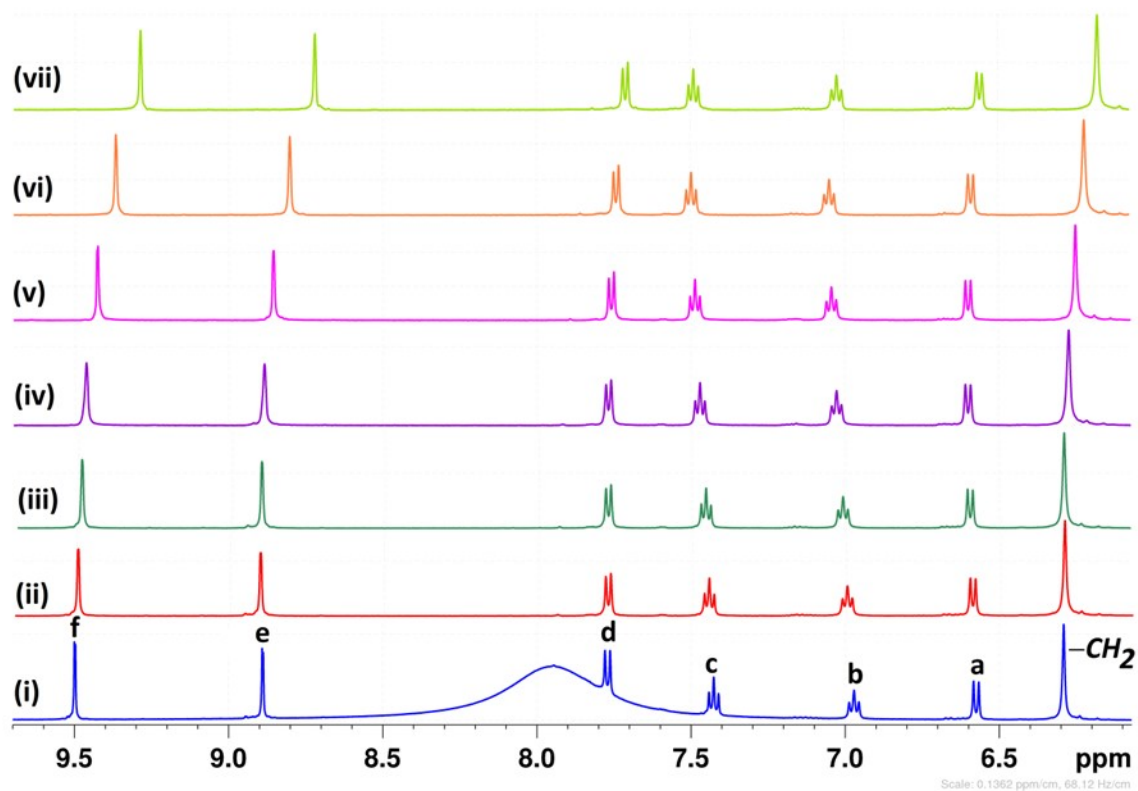

**Figure S30.**  $^1\text{H-NMR}$  spectra of titration of **TMe** +  $\text{CF}_3\text{COOH}$  at 298 K in  $\text{DMSO-}d_6/\text{D}_2\text{O}$  mixture in the following vol/vol ratio (i) 100:0 (ii) 98.5:1.5, (iii) 97:3, (iv) 92.5:7.5, (v) 72:28, (vi) 87.5:12.5 and (vii) 66:34.

## References

1. (a) G. M. Sheldrick, SHELXS-97: Program for Crystal Structure Solution; University of Göttingen: Göttingen, Germany, 1997. (b) G. M. Sheldrick, *Acta Crystallogr., Sect. A: Found. Crystallogr.* 2008, **64**, 112–122; (c) G. M. Sheldrick, *Acta Crystallogr., Sect. C: Struct. Chem.* 2015, **71**, 3–8; (d) A. L. Spek, *J. Appl. Crystallogr.*, 2003, **36**, 7–13.
2. A. L. Spek, *Acta. Crystallogr C Struct. Chem.*, 2015, **71**, 9-18.
